# Supplementary material for: High-Throughput Sequencing Reveals Diverse Sets of Conserved, Nonconserved, and Species-Specific miRNAs in Jute
Source: Hindawi journal article supplement (doi:10.1155/2015/125048), 2015-01-01
Supplement: f1 [file 125048.f1.zip]

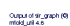

Created Sun Mar 25 04:14:22 2014

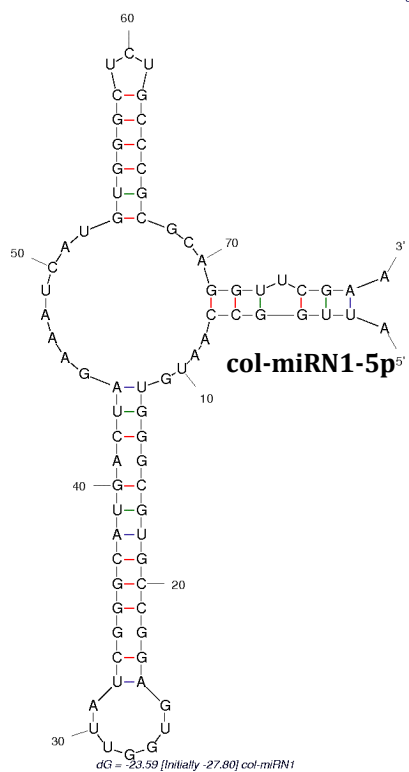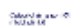

© 2005 Blackwell Publishing Ltd *Journal of Internal Medicine* 258: 289–294

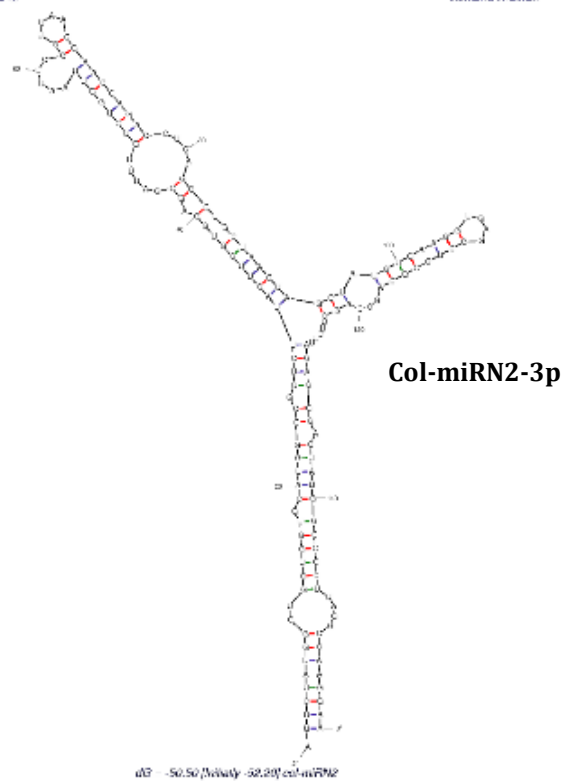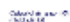

Creative Commons Attribution-ShareAlike 4.0 International License

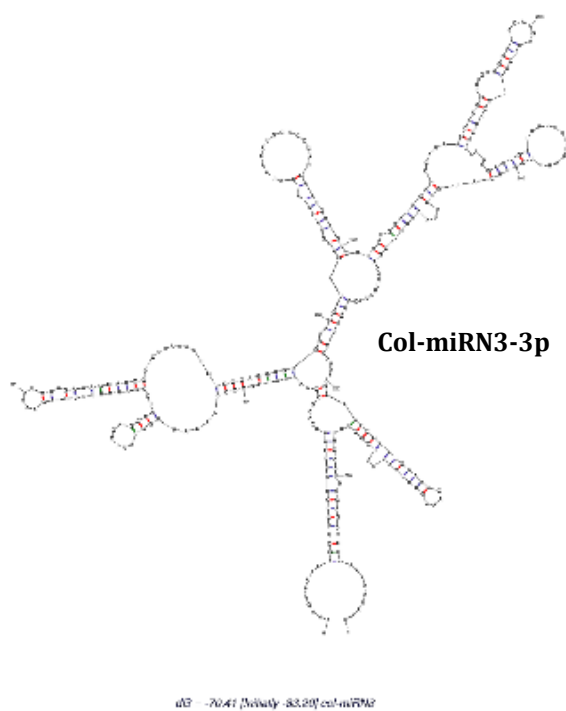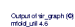

Created Sun Feb 9 08:45:12 2014

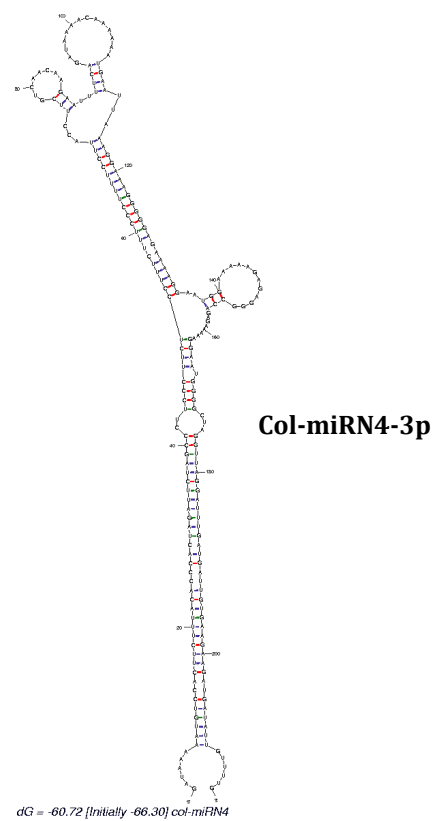

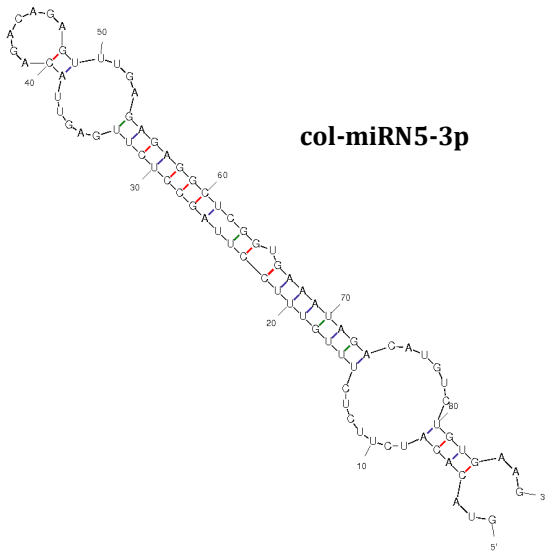

**col-miR5-3p**

dG = -23.70 [Initially -23.70] col-miR5

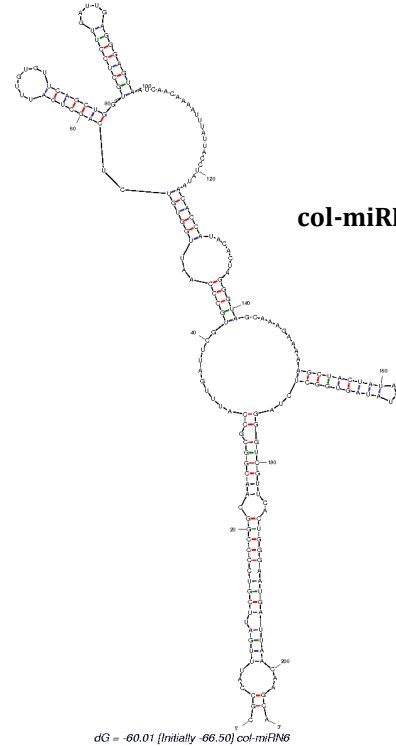

**col-miR6-5p**

dG = -60.01 [Initially -66.50] col-miR6

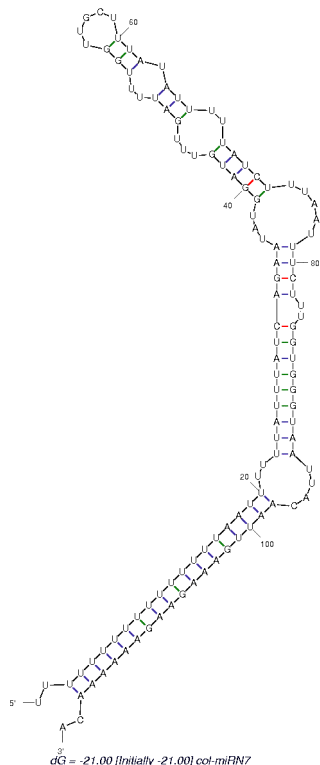

**col-miR7-5p**

dG = -21.00 [Initially -21.00] col-miR7

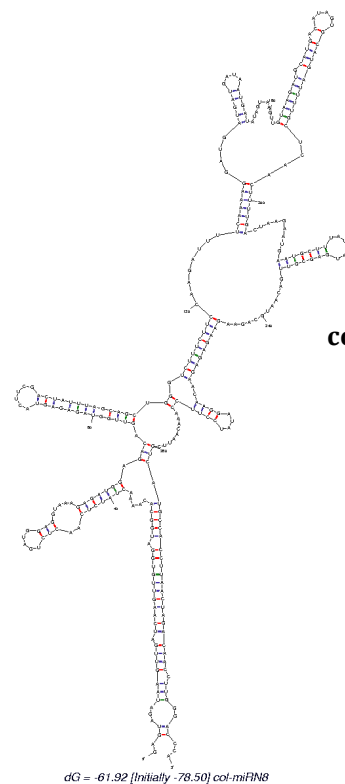

**col-miR8-5p**

dG = -61.92 [Initially -78.50] col-miR8

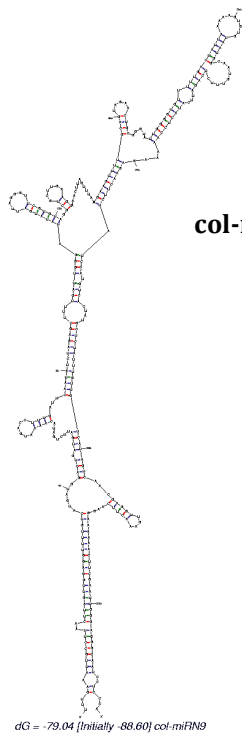

**col-miR9-3p**

dG = -79.04 [Initially -88.60] col-miR9

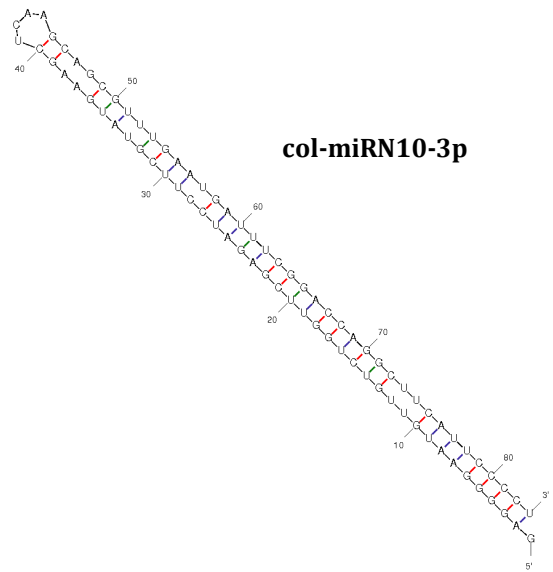

**col-miR10-3p**

dG = -48.30 [Initially -48.30] col-miR10

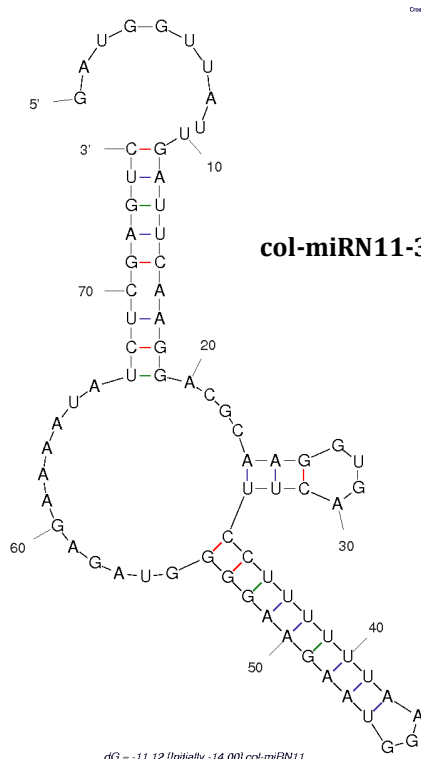

**col-miR11-3p**

dG = -11.12 [Initially -14.00] col-miR11

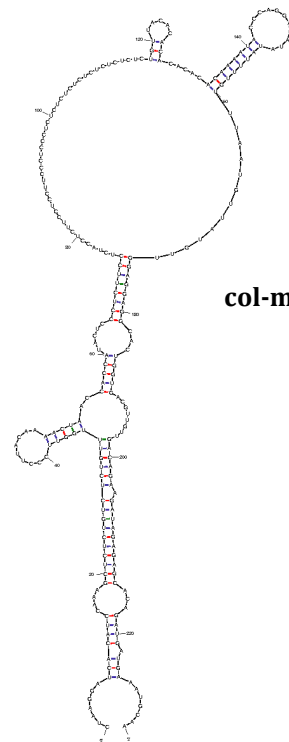

**col-miR12-3p**

dG = -43.27 [Initially -51.10] col-miR12

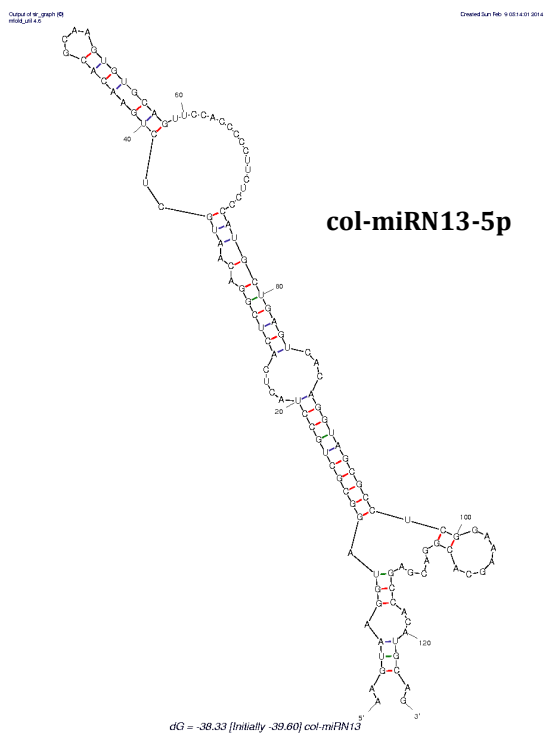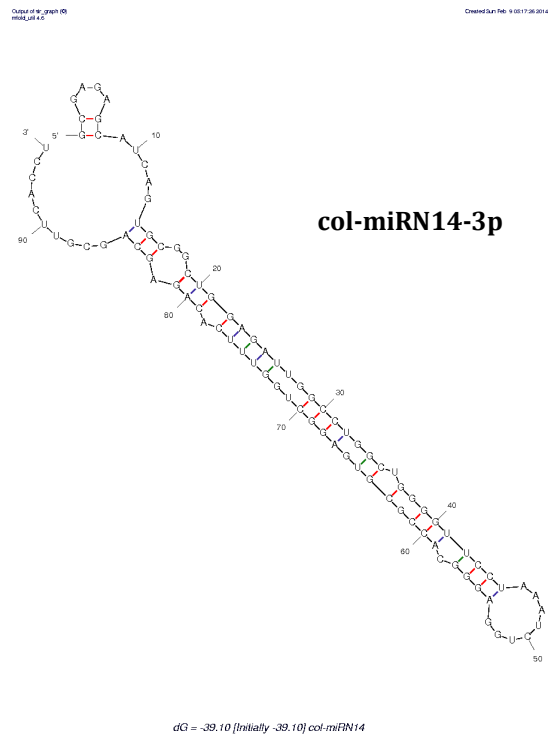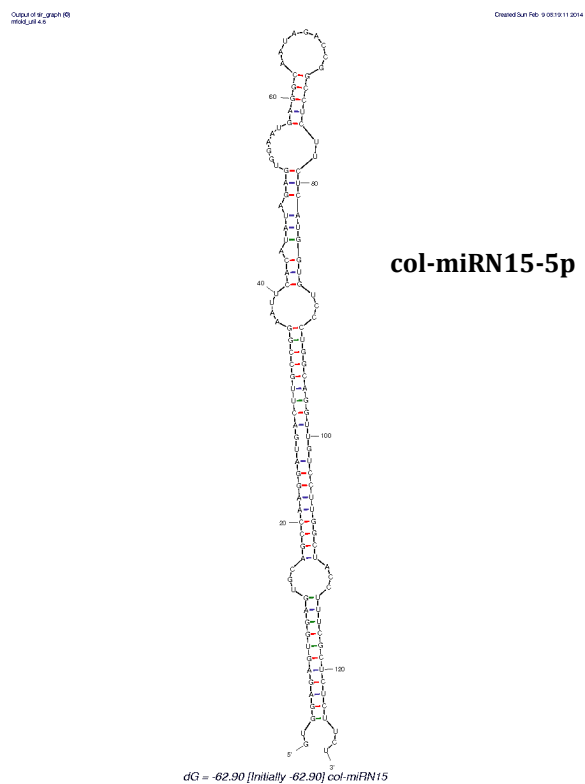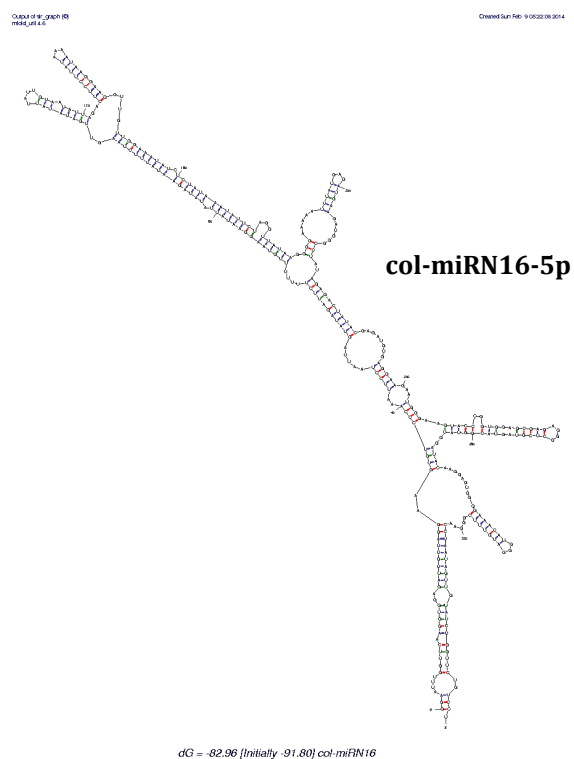

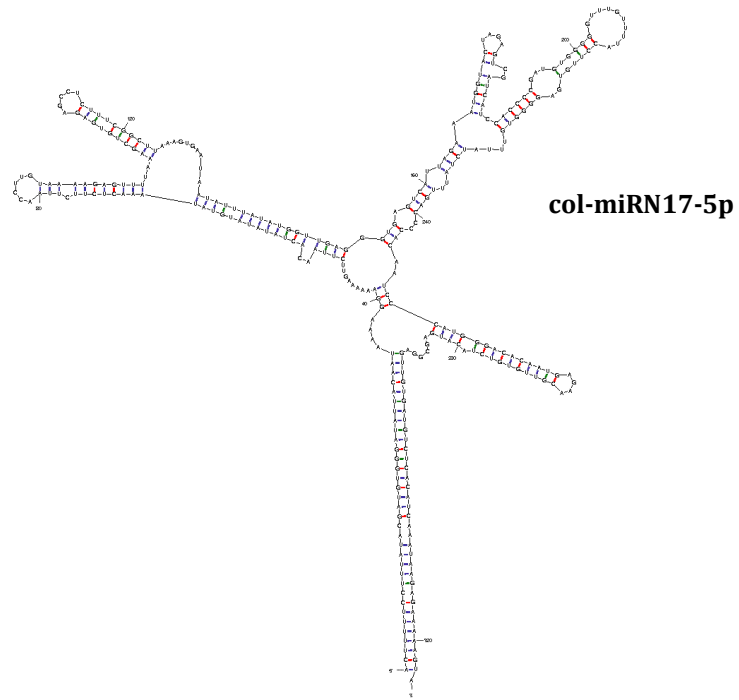

dG = -97.01 [initially -104.50] col-miR17
