# Supplementary material for: High-Throughput Sequencing Reveals Diverse Sets of Conserved, Nonconserved, and Species-Specific miRNAs in Jute
Source: Hindawi journal article supplement (doi:10.1155/2015/125048), 2015-01-01
Supplement: f1 [file 125048.f1.zip]

**Supplementary file-1:**

| Type             | Unique reads | Total reads |
|------------------|--------------|-------------|
| Exon_antisense   | 370          | 2415        |
| Exon_sense       | 488          | 612         |
| Intron_antisense | 1010         | 8243        |
| Intron_sense     | 1148         | 19000       |
| miRNA            | 33433        | 8994892     |
| rRNA             | 53576        | 538492      |
| repeat           | 1670         | 76241       |
| snRNA            | 1270         | 2803        |
| snoRNA           | 673          | 1378        |
| tRNA             | 12796        | 891381      |
| Unannotated tags | 3010673      | 6108867     |
