# Supplementary material for: High-Throughput Sequencing Reveals Diverse Sets of Conserved, Nonconserved, and Species-Specific miRNAs in Jute
Source: Int J Genomics. 2015 Mar 16;2015:125048. doi: 10.1155/2015/125048 (PMC4378336; doi:10.1155/2015/125048)
Supplement: Supplementary file 1 — Supplementary file-1 contains total and unique reads of different RNAs that have been sequenced. Supplementary file-2 contains all the known miRNAs in jute seedling that have been found in this study. Supplementary file-3 covers the secondary structures of novel miRNA in jute predicted using Mfold. Supplementary file-4 holds the detail of novel jute miRNAs. Supplementary file-5 contains the detail of predicted targets for some of the known miRNAs. Supplementary file-6 covers the detail of predicted targets for novel miRNAs. Supplementary file-7 contains the biological functions of predicted targets. Supplementary file-8 contains the detail of pathways for predicted miRNAs. Supplementary file-9 contains the validation of predicted targets by another tool. [file 125048.f1.zip › Supplementary-2,(4-8).xlsx]

## Sheet: Supplementary file-2
Jute Family	Jute miRNA	length of small RNA sequence	count of small RNA sequence	small RNA sequnce	homolog (best one)	homolog length	homolog sequence	family	match number	mismatch number	gap number	score
miR156	col-miR157a-5p	21	5531609	TTGACAGAAGATAGAGAGCAC	ath-miR157a	21	TTGACAGAAGATAGAGAGCAC	MIR156	21	0	0	42
	col-miR157a-3p	22	27	GCTCTCTAGTCTTCTGTCATCA	aly-miR157a-3p	22	GCTCTCTAGCCTTCTGTCATCA	MIR156	21	1	0	41
	col-miR157d-5p	20	78895	TGACAGAAGATAGAGAGCAC	ath-miR157d	20	TGACAGAAGATAGAGAGCAC	MIR156	20	0	0	40
	col-miR157d-3p	21	1389	GCTCTCTATGCTTCTGTCATC	aly-miR157d-3p	21	GCTCTCTATGCTTCTGTCATC	MIR156	21	0	0	42
	col-miR156a	20	1724997	TGACAGAAGAGAGTGAGCAC	ath-miR156a	20	TGACAGAAGAGAGTGAGCAC	MIR156	20	0	0	40
	col-miR156b-5p	21	1496	CTGACAGAAGATAGAGAGCAC	smo-miR156b	21	CTGACAGAAGATAGAGAGCAC	MIR156	21	0	0	42
	col-miR156b-3p	22	37	TGCTCACTCTCTATCTGTCATC	mtr-miR156b-3p	22	TGCTCACTCTCTATCTGTCACC	MIR156	21	1	0	41
	col-miR156c-5p	21	17951	TTGACAGAAGAGAGAGAGCAC	ahy-miR156c	21	TTGACAGAAGAGAGAGAGCAC	MIR156	21	0	0	42
	col-miR156c-3p	22	2	GCTCACTTCTCTTCTGTCAGCT	osa-miR156c-3p	22	GCTCACTTCTCTCTCTGTCAGC	MIR156	21	0	2	36
	col-miR156d-3p	22	494	GCTCTCTATGCTTCTGTCATCA	stu-miR156d-3p	22	GCTCTCTATGCTTCTGTCATCA	MIR156	22	0	0	44
	col-miR156d-5p	21	336	TTGACAGAAGAGAGGGAGCAC	smo-miR156d	21	TTGACAGAAGACAGGGAGCAC	MIR156	20	1	0	39
	col-miR156e-5p	20	177	TGACAGAGGAGAGTGAGCAC	vvi-miR156e	20	TGACAGAGGAGAGTGAGCAC	MIR156	20	0	0	40
	col-miR156e-3p	21	2	GCTTTCTCTTCTTCTGTCACC	aly-miR156e-3p	21	GCTTACTCTCTCTCTGTCACC	MIR156	19	1	2	31
	col-miR156f-5p	22	5276	TTGACAGAAGATAGAGAGCACA	gma-miR156f	22	TTGACAGAAGAGAGAGAGCACA	MIR156	21	1	0	41
	osa-miR156f-3p	22	113	GCTCACATCTCTTTCTGTCAGC	osa-miR156f-3p	22	GCTCACTTCTCTTTCTGTCAGC	MIR156	21	1	0	41
	col-miR156g-5p	21	1743	TTGACAGAAGATAGAGGGCAC	mtr-miR156g-5p	21	TTGACAGAAGATAGAGGGCAC	MIR156	21	0	0	42
	col-miR156g-3p	21	40	GCTCTCTAGTCTTCTGTCATC	mtr-miR156g-3p	21	GCTCTCTAGACTTCTGTCATC	MIR156	20	1	0	39
	col-miR156h-3p	21	4	GCTCTTTATGCTTCTGTCATC	mtr-miR156h-3p	21	GCTCTTTATTCTTCTGTCATC	MIR156	20	1	0	39
	col-miR156i-3p	21	2220	GCTCACTCTCTATCTGTCATC	zma-miR156i-3p	22	GCTCACTGCTCTATCTGTCATC	MIR156	21	0	1	39
	col-miR156j-5p	20	855	GGACAGAAGAGAGTGAGCAC	cme-miR156j	22	GTTGACAGAAGAGAGTGAGCAC	MIR156	20	0	2	34
	col-miR156j-3p	21	1	GCTCATCCTCTTTCTGTCAGC	osa-miR156j-3p	22	GCTCGCTCCTCTTTCTGTCAGC	MIR156	20	1	1	36
	col-miR156k	21	58207	TTGACAGAAGAGAGTGAGCAC	gma-miR156k	21	TTGACAGAAGAGAGTGAGCAC	MIR156	21	0	0	42
	col-miR156l	21	555	TTGACAGAAGATGGAGAGCAC	ptc-miR156l	21	TTGACAGAAGATGGAGAGCAC	MIR156	21	0	0	42
	col-miR156p	20	1	TGACAGAAGAAAGGGAGCAC	gma-miR156p	21	TTGACAGAAGAAAGGGAGCAC	MIR156	20	0	1	37
	col-miR156q	21	8272	TGACAGAAGAGAGTGAGCACT	gma-miR156q	21	TGACAGAAGAGAGTGAGCACT	MIR156	21	0	0	42
	col-miR156r	20	159	TGACAGAAGATAGAGAGCAT	gma-miR156r	21	CTGACAGAAGATAGAGAGCAT	MIR156	20	0	1	37
miR166	col-miR166a	21	215636	TCGGACCAGGCTTCATTCCCC	ath-miR166a	21	TCGGACCAGGCTTCATTCCCC	MIR166	21	0	0	42
	col-miR166b	22	20	TCGGACCAGGCTTCATTCCCTT	crt-miR166b	22	TCGGACCAGGCTTCATTCCCTT	MIR166	22	0	0	44
	col-miR166d-5p	21	1891	GGAATGTTGTCTGGCTCGAGG	osa-miR166d-5p	21	GGAATGTTGTCTGGCTCGAGG	MIR166	21	0	0	42
	col-miR166e-3p	21	784	TTCGGACCAGGCTTCATTCCC	bdi-miR166e-3p	21	CTCGGACCAGGCTTCATTCCC	MIR166	20	1	0	39
	col-miR166e-5p	19	26	GGACCAGGCTTCATTCCCC	cpa-miR166e	19	GGACCAGGCTTCATTCCCC	MIR166	19	0	0	38
	col-miR166g-3p	21	128	TCGGACCAGGCTTCATTCCTC	osa-miR166g-3p	21	TCGGACCAGGCTTCATTCCTC	MIR166	21	0	0	42
	col-miR166g-5p	21	97	GGAATGTTGTTTGGCTCGAGG	aly-miR166g-5p	21	GGAATGTTGTTTGGCTCGAGG	MIR166	21	0	0	42
	col-miR166h-3p	21	12548	TCTCGGACCAGGCTTCATTCC	gma-miR166h-3p	21	TCTCGGACCAGGCTTCATTCC	MIR166	21	0	0	42
	col-miR166h-5p	21	3	GGAATGTTGGCTGGCTCGATG	osa-miR166h-5p	21	GGAATGTTGGCTGGCTCGAGG	MIR166	20	1	0	39
	col-miR166i-3p	21	588	TTGGACCAGGCTTCATTCCCC	mes-miR166i	21	TTGGACCAGGCTTCATTCCCC	MIR166	21	0	0	42
	col-miR166i-5p	21	88	AATGAAGTTTGATCCAAGATA	osa-miR166i-5p	21	AATGCAGTTTGATCCAAGATC	MIR166	19	2	0	36
	col-miR166j-3p	21	19344	TCGGACCAGGCTTCATTCCCG	gma-miR166j-3p	21	TCGGACCAGGCTTCATTCCCG	MIR166	21	0	0	42
	col-miR166k	20	13	TCGGACCAGGCTTCATTCCT	sbi-miR166k	20	TCGGACCAGGCTTCATTCCT	MIR166	20	0	0	40
	col-miR166m	21	333	TCGGACCAGGCTTCATTCCCT	osa-miR166m	21	TCGGACCAGGCTTCATTCCCT	MIR166	21	0	0	42
	col-miR166n	21	44	TCGGACCAGGCTTCATTCCTT	ptc-miR166n	21	TCGGACCAGGCTTCATTCCTT	MIR166	21	0	0	42
	col-miR166u	20	92	TCTCGGACCAGGCTTCATTC	gma-miR166u	20	TCTCGGACCAGGCTTCATTC	MIR166	20	0	0	40
	col-miR165a-3p	21	291	TCGGACCAGGCTTCATCCCCC	ath-miR165a	21	TCGGACCAGGCTTCATCCCCC	MIR166	21	0	0	42
	col-miR165a-5p	20	4	GAATGTTGTCTGGTTCGAAG	aly-miR165a-5p	20	GAATGTTGTCTGGATCGAGG	MIR166	18	2	0	34
miR167	col-miR167a	21	35814	TGAAGCTGCCAGCATGATCTA	ath-miR167a	21	TGAAGCTGCCAGCATGATCTA	MIR167_1	21	0	0	42
	col-miR167b-3p	23	12	GGTCATGCTCTGACAGCCTCACT	aly-miR167b-3p	23	GGTCATGCTCTGACAGCCTCACT	MIR167_1	23	0	0	46
	col-miR167b-5p	21	14	TGAAGCTGACAGCATGATCTA	tae-miR167b	21	TGAAGCTGACAGCATGATCTA	MIR167_1	21	0	0	42
	col-miR167c	21	177	TGAAGCTGCCAGCATGATCTC	vvi-miR167c	21	TGAAGCTGCCAGCATGATCTC	MIR167_1	21	0	0	42
	col-miR167d-5p	22	24662	TGAAGCTGCCAGCATGATCTAG	ath-miR167d	22	TGAAGCTGCCAGCATGATCTGG	MIR167_1	21	1	0	41
	col-miR167d-3p	21	40	AGGTCATCTTGCAGCTTCAAT	aly-miR167d-3p	21	AGGTCATCCTGCAGCTTCAGT	MIR167_1	19	2	0	36
	col-miR167f-5p	21	1945	TGAAGCTGCCAGCATGATCTT	ptc-miR167f-5p	21	TGAAGCTGCCAGCATGATCTT	MIR167_1	21	0	0	42
	col-miR167f-3p	21	87	AGATCATATGGCAGTTTCACC	ptc-miR167f-3p	21	AGATCATGTGGCAGTTTCACC	MIR167_1	20	1	0	39
	col-miR167h	22	154973	TGAAGCTGCCAGCATGATCTTA	mdm-miR167h	22	TGAAGCTGCCAGCATGATCTTA	MIR167_1	22	0	0	44
miR396	col-miR396a-5p	21	435	TTCCACAGCTTTCTTGAACTG	ath-miR396a	21	TTCCACAGCTTTCTTGAACTG	MIR396	21	0	0	42
	col-miR396a-3p	21	283	GTTCAAGAAAGCTGTGGGATA	cca-miR396a-3p	21	GTTCAAGAAAGCTGTGGGAAA	MIR396	20	1	0	39
	col-miR396b-3p	21	18695	GCTCAAGAAAGCTGTGGGAGA	gma-miR396b-3p	21	GCTCAAGAAAGCTGTGGGAGA	MIR396	21	0	0	42
	col-miR396b-5p	21	493	TTCCACAGCTTTCTTGAACTT	ath-miR396b	21	TTCCACAGCTTTCTTGAACTT	MIR396	21	0	0	42
	col-miR396c	21	38	TCAAGAAAGCTGTGGGAGAAC	cca-miR396c	21	TTCAAGAAAGCTGTGGGAAAA	MIR396	19	1	2	31
	col-miR396e-3p	20	1697	CTCAAGAAAGCTGTGGGAGA	ptc-miR396e-3p	20	CTCAAGAAAGCTGTGGGAGA	MIR396	20	0	0	40
	col-miR396e-5p	22	52	TTCCACAGCTTTCTTGAACTTT	gma-miR396e	22	TTCCACAGCTTTCTTGAACTGT	MIR396	21	1	0	41
	col-miR396f	20	16	TTCCACGGCTTTCTTGAACT	ptc-miR396f	21	TTCCACGGCTTTCTTGAACTG	MIR396	20	0	1	37
	col-miR396g-5p	21	173	TTCCACGGCTTTCTTGAACTT	ptc-miR396g-5p	21	TTCCACGGCTTTCTTGAACTT	MIR396	21	0	0	42
	col-miR396g-3p	20	198	CTCAAGAAAGCCGTGGGAAA	ptc-miR396g-3p	21	CTCAAGAAAGCCGTGGGAAAA	MIR396	20	0	1	37
	col-miR396h	21	3	CCACAGCTTTCTTGAACTGCA	gma-miR396h	20	TCCACAGCTTTCTTGAACTG	MIR396	19	0	3	29
	col-miR396	21	24	TTTTCCACGGCTTTCTTGAAC	smo-miR396	20	TTCCACGGCTTTCTTGAACC	MIR396	19	0	3	29
miR168	col-miR168a-5p	21	16590	TCGCTTGGTGCAGGTCGGGAA	ath-miR168a	21	TCGCTTGGTGCAGGTCGGGAA	MIR168	21	0	0	42
	col-miR168a-3p	21	327	CCCGCCTTGCATCAACTGAAT	ptc-miR168a-3p	21	CCCGCCTTGCATCAACTGAAT	MIR168	21	0	0	42
	col-miR168b	22	663	AATTCGCTTGGTGCAGGTCGGG	gma-miR168b	19	TCGCTTGGTGCAGGTCGGG	MIR168	19	0	3	29
miR164	col-miR164a	21	7491	TGGAGAAGCAGGGCACGTGCA	ath-miR164a	21	TGGAGAAGCAGGGCACGTGCA	MIR164	21	0	0	42
	col-miR164b-3p	21	5	CATGTGCCCATCTTCCCCATC	aly-miR164b-3p	21	CATGTGCCCATCTTCACCATC	MIR164	20	1	0	39
	col-miR164c	21	6	TGGAGAAGCAGGGCACGTGCG	ath-miR164c	21	TGGAGAAGCAGGGCACGTGCG	MIR164	21	0	0	42
	col-miR164d	21	213	TGGAGAAGCAGGGCACGTGCT	osa-miR164d	21	TGGAGAAGCAGGGCACGTGCT	MIR164	21	0	0	42
	col-miR164f-5p	21	29	TGGAGAAGCAGGGCACATGCT	ptc-miR164f	21	TGGAGAAGCAGGGCACATGCT	MIR164	21	0	0	42
	col-miR164f-3p	18	1	CACGTGCTCTTCTCCAAC	zma-miR164f-3p	21	CACGTGCGCTCCTTCTCCAAC	MIR164	18	0	3	27
	col-miR164g-3p	21	15	CACGTGCTCCCCTTCTCCAAC	zma-miR164g-3p	21	CACGTGCTCCCCTTCTCCACC	MIR164	20	1	0	39
miR169	col-miR169e-3p	21	7	GGCAATCATCCTTGGCTAAGC	bdi-miR169e-3p	19	GGCAGTCTCCTTGGCTAGC	MIR169_1	18	1	2	29
	col-miR169e-5p	21	386	AGCCAAGGATGACTTGCCGGC	gma-miR169e	20	AGCCAAGGATGACTTGCCGG	MIR169_8	20	0	1	37
	col-miR169f	21	4	TAGCCAAGGATGATTTGCCTA	osa-miR169f.1	21	TAGCCAAGGATGACTTGCCTA	MIR169_1	20	1	0	39
	col-miR169g	22	3	TAGCCAAGGATGACTTGCCTGA	bna-miR169g	22	TAGCCAAGGATGACTTGCCTGC	MIR169_1	21	1	0	41
	col-miR169h	21	32	TAGCCAAGGATGACTTGCCTG	ath-miR169h	21	TAGCCAAGGATGACTTGCCTG	MIR169_1	21	0	0	42
	col-miR169j-3p	20	3	GGCAGTCACCTTGGCTAATC	aly-miR169j-3p	19	GGCAGTCTCCTTGGCTATC	MIR169_1	18	1	1	32
	col-miR169a-5p	21	1590	CAGCCAAGGATGACTTGCCGA	ath-miR169a	21	CAGCCAAGGATGACTTGCCGA	MIR169_2	21	0	0	42
	col-miR169a-3p	21	34	GGCAAGTTGTTCTTGGCTACA	zma-miR169a-3p	21	GGCAAGTTGTTCTTGGCTACA	MIR169_2	21	0	0	42
	col-miR169b	21	2528	CAGCCAAGGATGACTTGCCGG	ath-miR169b	21	CAGCCAAGGATGACTTGCCGG	MIR169_2	21	0	0	42
	col-miR169c-3p	22	216	CGGCAAGTCTGTCCTTGGCTAC	zma-miR169c-3p	22	GGCAAGTCTGTCCTTGGCTACA	MIR169_2	21	0	2	36
	col-miR169d	21	7	AGCCAAGGATGACTTGCCGGT	gma-miR169d	23	TGAGCCAAGGATGACTTGCCGGT	MIR169_2	21	0	2	36
	col-miR169l-3p	21	118	CGGCAAGTTGTCTTTGGCTAC	gma-miR169l-3p	22	CGGGCAAGTTGTTTTTGGCTAC	MIR169_2	20	1	1	36
	col-miR169n-5p	22	10	TTGAGTCAAGAATGGCTTGCCG	tcc-miR169n	21	TGAGTCAAGAATGACTTGCCG	MIR169_2	20	1	1	36
	col-miR169n-3p	21	1	GCAAGCATCCTCTTCTTCTCC	ptc-miR169n-3p	20	GCAAGCATCCTTGGTTCTCC	MIR169_2	18	2	1	31
	col-miR169r-3p	21	645	GGCAAGTTGTCTTTGGCTACA	zma-miR169r-3p	21	GGCAAGTTGTCCTTGGCTACA	MIR169_2	20	1	0	39
	col-miR169s	21	47	GCAGCCAAGGATGACTTGCCG	ptc-miR169s	21	TCAGCCAAGGATGACTTGCCG	MIR169_2	20	1	0	39
	col-miR169u	21	21	CAGCCAAGGATGACTTGCCGT	gma-miR169u	21	CAGCCAAGGATGACTTGCCGT	MIR169_2	21	0	0	42
	col-miR169v	20	1	GCAGCCAAGGATGACTTGCC	gma-miR169v	19	CAGCCAAGGATGACTTGCC	MIR169_2	19	0	1	35
miR390	col-miR390a-5p	21	2952	AAGCTCAGGAGGGATAGCGCC	ath-miR390a	21	AAGCTCAGGAGGGATAGCGCC	MIR390	21	0	0	42
	col-miR390a-3p	21	40	CGCTATCCATCCTGAGTTTCA	aly-miR390a-3p	21	CGCTATCCATCCTGAGTTTCA	MIR390	21	0	0	42
	col-miR390d-3p	20	1	CGCTATCCATCCTGAGTTTA	ptc-miR390d-3p	21	CGCTATCCATCCTGAGTTTTA	MIR390	20	0	1	37
	col-miR390e	20	138	AGCTCAGGAGGGATAGCGCC	gma-miR390e	20	AGCTCAGGAGGGATAGCGCC	MIR390	20	0	0	40
miR2950	col-miR2950-3p	21	2465	TGGTGTGCAGGGGGTGGAATA	ghr-miR2950	21	TGGTGTGCAGGGGGTGGAATA	MIR2950	21	0	0	42
	col-miR2950-5p	21	213	TTCCATCTCTTGCACACTGGA	vvi-miR2950-5p	21	TTCCATCTCTTGCACACTGGA	MIR2950	21	0	0	42
miR172	col-miR172a-3p	21	1480	AGAATCTTGATGATGCTGCAT	ath-miR172a	21	AGAATCTTGATGATGCTGCAT	MIR172	21	0	0	42
	col-miR172a-5p	21	56	GCGGCATCTTCAAGATTCACA	aly-miR172a-5p	21	GTGGCATCATCAAGATTCACA	MIR172	19	2	0	36
	col-miR172b-5p	21	4	GGAGCATCATCAAGATTCACA	ptc-miR172b-5p	21	GGAGCATCATCAAGATTCACA	MIR172	21	0	0	42
	col-miR172c-3p	21	11	AGAATCTTGATGATGCTGCAG	ath-miR172c	21	AGAATCTTGATGATGCTGCAG	MIR172	21	0	0	42
	col-miR172c-5p	21	5	GTAGCATCATCAAGATTCACA	mtr-miR172c-5p	21	GTAGCATCATCAAGATTCACA	MIR172	21	0	0	42
	col-miR172d-3p	21	30	GGAATCCTGATGATGCTGCAT	tcc-miR172d	21	AGAATCCTGATGATGCTGCAT	MIR172	20	1	0	39
	col-miR172d-5p	21	2	TGGAGCATCATCAAGATTCAC	mtr-miR172d-5p	24	AGTGGAGCATCATCAAGATTCACA	MIR172	21	0	3	33
	col-miR172e	21	3	GGAATCTTGATGATGCTGCAT	ath-miR172e	21	GGAATCTTGATGATGCTGCAT	MIR172	21	0	0	42
	col-miR172h-5p	21	5	GCAGCATCATCAAGATTCACA	gma-miR172h-5p	21	GCAGCAGCATCAAGATTCACA	MIR172	20	1	0	39
	col-miR172k	21	7	TGAATCTTGATGATGCTGCAT	gma-miR172k	21	TGAATCTTGATGATGCTGCAT	MIR172	21	0	0	42
miR5067	col-miR5049c	24	3837	GGACAATTATTGTGGGACGGAGGG	hvu-miR5049c	23	AGACAATTATTTTGGGACGGAGG	MIR5067	21	2	1	37
mir160	col-miR160a-3p	21	1448	GCGTATGAGGAGCCAAGCATA	gma-miR160a-3p	21	GCGTATGAGGAGCCAAGCATA	MIR160	21	0	0	42
	col-miR160a-5p	21	146	TGCCTGGCTCCCTGTATGCCA	ath-miR160a	21	TGCCTGGCTCCCTGTATGCCA	MIR160	21	0	0	42
	col-miR160b	21	24	ATGCCTGGCTCCCTGTATGCC	gma-miR160b	20	TGCCTGGCTCCCTGTATGCC	MIR160	20	0	1	37
	col-miR160c-3p	21	1	GCGTACAAGGAGTCAAGCATG	aly-miR160c-3p	21	GCGTACAAGGAGCCAAGCATG	MIR160	20	1	0	39
	col-miR160e-3p	21	1	GCAGGAGGGGAGTGACGCAGG	ptc-miR160e-3p	21	GCATGAGGGGAGTCGAGCAGG	MIR160	19	1	2	31
	col-miR160f-5p	21	10	TGCCTGGCTCCCTGAATGCCA	osa-miR160f-5p	21	TGCCTGGCTCCCTGAATGCCA	MIR160	21	0	0	42
	col-miR160g	22	7	TGCCTGGCTCCCTGTATGCCAT	mes-miR160g	23	TGCCTGGCTCCCTGTATGCCATC	MIR160	22	0	1	41
	col-miR160h	22	2	TGCCTGGCTCCCTGTATGTTTT	mes-miR160h	23	TGCCTGGCTCCCTGTATGCCATT	MIR160	20	2	1	35
miR482	col-miR482f	22	2206	TCTTACCTACTCCACCCATGCC	ghr-miR482b	22	TCTTGCCTACTCCACCCATGCC	MIR482	21	1	0	41
	col-miR482b-5p	21	1047	TATGGGGGGAATGGGCAGGAT	gma-miR482b-5p	22	TATGGGGGGATTGGGAAGGAAT	MIR482	19	2	1	33
	col-miR482b-3p	22	261	TCTTCCCTACACCTCCCATACC	gma-miR482b-3p	22	TCTTCCCTACACCTCCCATACC	MIR482	22	0	0	44
	col-miR482e-5p	20	47	GTGGGTGGAGGGGCAAGATA	nta-miR482b-5p	21	AGTGGGTGGAGTGGTAAGATA	MIR482	18	2	1	31
MiR482	col-miR472-5p	21	1	TTGGTCGAAGTAGGCAAAATC	aly-miR472-5p	21	ATGGTCGAAGTAGGCAAAATC	MIR482	20	1	0	39
miR159	col-miR159a	21	484	TTTGGATTGAAGGGAGCTCTA	ath-miR159a	21	TTTGGATTGAAGGGAGCTCTA	MIR159	21	0	0	42
	col-miR159b	21	16	TTTGGATTGAAGGGAGCTCTT	ath-miR159b	21	TTTGGATTGAAGGGAGCTCTT	MIR159	21	0	0	42
	col-miR159c	20	742	TTTGGATTGAAGGGAGCTCC	ath-miR159c	21	TTTGGATTGAAGGGAGCTCCT	MIR159	20	0	1	37
	col-miR159d	21	1	AGCTGCTAAGCTATGGATCCC	gma-miR159d	21	AGCTGCTTAGCTATGGATCCC	MIR159	20	1	0	39
	col-miR159e-3p	20	20	TTGGTGTGAAGGGAGCTCCT	ptc-miR159e	21	CTTGGGGTGAAGGGAGCTCCT	MIR159	19	1	1	34
	col-miR159e-5p	20	3	GAGCTCTCTGAAGTCCAATT	gma-miR159e-5p	20	GAGCTCCTTGAAGTCCAATT	MIR159	18	2	0	34
	col-miR4414b	21	193	TGTGAATGATGCGGGAGATAT	mtr-miR4414b	21	TGTGAATGATGCGGGAGCTAA	MIR159	19	2	0	36
	col-miR319a-3p	21	39	TTGGACTGAAGGGAGCTCCCT	ath-miR319a	21	TTGGACTGAAGGGAGCTCCCT	MIR159	21	0	0	42
	col-miR319a-5p	21	13	AGCTGCCGACTCATTCATTCA	osa-miR319a-5p	21	AGCTGCCGAATCATCCATTCA	MIR159	19	2	0	36
	col-miR319b-3p	22	83	TAGCTGCCGACTCATTCATCCA	ppe-miR319b	22	TAGCTGCCGAGTCATTCATCCA	MIR159	21	1	0	41
	col-miR319c	21	6	CTTGGACTGAAGGGAGCTCCC	ppt-miR319c	21	CTTGGACTGAAGGGAGCTCCC	MIR159	21	0	0	42
	col-miR319g	22	1	TTGGACTGAAGGGAGCTCCCTC	gma-miR319g	22	TTGGACTGAAGGGAGCTCCTTC	MIR159	21	1	0	41
miR171	col-miR171a	21	80	TGATTGAGCCGCGCCAATATC	ath-miR171a	21	TGATTGAGCCGCGCCAATATC	MIR171_1	21	0	0	42
	col-miR171b-5p	21	558	TGATTGAGCCGTGCCAATATC	osa-miR171b	21	TGATTGAGCCGTGCCAATATC	MIR171_1	21	0	0	42
	col-miR171b-3p	21	16	TTGAGCCGTGCCAATATCACG	ath-miR171b	21	TTGAGCCGTGCCAATATCACG	MIR171_1	21	0	0	42
	col-miR171c-5p	21	127	AGATATTGGTGCGGTTCAATC	aly-miR171c-5p	21	AGATATTGGTGCGGTTCAATC	MIR171_1	21	0	0	42
	col-miR171c-5p_1	21	61	TATTGGTCCGGTTCAATAAGA	zma-miR171c-5p	21	TATTGGTGCGGTTCAATCAGA	MIR171_1	19	2	0	36
	col-miR171d	20	4	TTGAGCCGCGCCAATATCAC	sly-miR171d	20	TTGAGCCGCGCCAATATCAC	MIR171_1	20	0	0	40
	col-miR171e-5p	21	13	TGTTGGCTCGGTTCACTCAGA	osa-miR171e-5p	21	TGTTGGCTCGGCTCACTCAGA	MIR171_1	20	1	0	39
	col-miR171e-5p_1	21	4	CGATGTTGGTGAGGTTCAATC	mtr-miR171e-5p	21	CGATGTTGGTGAGGTTCAATC	MIR171_1	21	0	0	42
	col-miR171f	21	8	TTGAGCCGCGCCAATATCACT	vvi-miR171f	21	TTGAGCCGCGCCAATATCACT	MIR171_1	21	0	0	42
	col-miR171g	22	1	TGATTGAGCCGCGCCAATATCC	bna-miR171g	22	TGATTGAGCCGCGCCAATATCT	MIR171_1	21	1	0	41
	col-miR171h-5p	21	77	TGTTGGAATGGCTCAATCAAA	ptc-miR171h-5p	21	TGTTGGGATGGCTCAATCATA	MIR171_1	19	2	0	36
	col-miR171b-3p_1	21	169	CGAGCCGAATCAATATCACTC	gma-miR171b-3p	21	CGAGCCGAATCAATATCACTC	MIR171_2	21	0	0	42
	col-miR171l-3p	20	1	CGAGCCGAATCAATATCACT	ptc-miR171l-3p	20	CGAGCCGAATCAATATCACT	MIR171_2	20	0	0	40
	col-miR479	22	12	CGTGATATTGCTTCGGCTCATC	ghr-miR479	22	CGTGATATTGGTTCGGCTCATC	MIR171_2	21	1	0	41
miR403	col-miR403	21	282	TTAGATTCACGCACAAACTCG	ath-miR403	21	TTAGATTCACGCACAAACTCG	MIR403	21	0	0	42
miR398	col-miR398	21	262	GGAGCGACATGAGATCACATG	hbr-miR398	21	GGAGCGACCTGAGATCACATG	MIR398	20	1	0	39
	col-miR398b	21	24	TGTGTTCTCAGGTCGCCCCTG	osa-miR398b	21	TGTGTTCTCAGGTCGCCCCTG	MIR398	21	0	0	42
miR818	col-miR1436	23	920	AGATAATATGGGACGGAGGGAGT	osa-miR1436	21	ACATTATGGGACGGAGGGAGT	MIR818	20	1	2	33
	col-miR1439	21	21	TTTTGGAACGGAAGGAGTATT	osa-miR1439	21	TTTTGGAACGGAGTGAGTATT	MIR818	19	2	0	36
miR1509	col-miR7122a	22	488	TTGGACAGAGAAATCACGGTCG	mdm-miR7122a	22	TTATACAGAGAAATCACGGTCG	MIR1509	20	2	0	38
miR408	col-miR408b	21	1	TGCACTGCCTCTTCCCTGGCT	ppt-miR408b	21	TGCACTGCCTCTTCCCTGGCT	MIR408	21	0	0	42
	col-miR408d	20	2	TGCACTGCCTCTTCCCTGGC	gma-miR408d	20	TGCACTGCCTCTTCCCTGGC	MIR408	20	0	0	40
	col-miR408a	21	129	ATGCACTGCCTCTTCCCTGGC	ath-miR408	21	ATGCACTGCCTCTTCCCTGGC	MIR408	21	0	0	42
miR397	col-miR397a	21	106	TCATTGAGTGCAGCGTTGATG	ath-miR397a	21	TCATTGAGTGCAGCGTTGATG	MIR397	21	0	0	42
	col-miR397b-3p	21	3	CCAGCGCTGCACTCAATCATG	zma-miR397b-3p	21	CCAGCGCTGCACTCAATTACG	MIR397	19	2	0	36
miR4414	col-miR4414a-3p	21	11	ATCCAACGATGCAGGAGCTGC	mtr-miR4414a-3p	21	ATCCAACGATGCGGGAGCTGC	MIR4414	20	1	0	39
miR530	col-miR530a	21	81	TGCATTTGCACCTGCACCTTT	csi-miR530a	21	TGCATTTGCACCTGCACCTTG	MIR530	20	1	0	39
	col-miR530-3p	21	1	AGGTGCAGAGGCAGATGCAAC	osa-miR530-3p	21	AGGTGCAGAGGCAGATGCAAC	MIR530	21	0	0	42
miR393	col-miR393b-3p	21	61	ATCATGCGATCCCTTCGGAAT	stu-miR393-3p	21	ATCATGCGATCTCTTCGGAAT	MIR393	20	1	0	39
	col-miR393d	21	24	GATCATGCGATCCCTTCGGAA	mdm-miR393d	21	ATCATGCGATCCCTTCGGACG	MIR393	19	1	2	31
	col-miR393b-5p	22	10	TCCAAAGGGATCGCATTGATCT	osa-miR393b-5p	22	TCCAAAGGGATCGCATTGATCT	MIR393	22	0	0	44
	col-miR393a	22	3	TCCAAAGGGATCGCATTGATCC	ath-miR393a	22	TCCAAAGGGATCGCATTGATCC	MIR393	22	0	0	44
miR2275	col-miR2275a-3p	22	54	TTAAGTTTTCTCCAATATCTCA	zma-miR2275a-3p	22	TTTGTTTTCCTCCAATATCTCA	MIR2275	20	1	2	33
	col-miR2275a	22	39	TTTAATTTCCTCCAATATCTCA	osa-miR2275a	22	TTTGGTTTCCTCCAATATCTCA	MIR2275	20	2	0	38
miR2118	col-miR2118a-3p	22	36	TTGCCGAATCCGCCCATTCCGT	gma-miR2118a-3p	21	TTGCCGATTCCACCCATTCCT	MIR2118	19	2	1	33
	col-miR2118	22	6	TTGCCGAATCCACCCATTCCGA	pvu-miR2118	22	TTGCCGATTCCACCCATTCCTA	MIR2118	20	2	0	38
miR158	col-miR158a	20	34	TCCCAAATGTAGACAAAGCA	ath-miR158a	20	TCCCAAATGTAGACAAAGCA	MIR158	20	0	0	40
miR477	col-miR477i	21	2	ACTCTCCCTCAAGGGCTTCCG	mes-miR477i	21	ACTCTCCCTCAAGGGCTTCCG	MIR477	21	0	0	42
miR827	col-miR827a	21	22	TTAGATGACCATCAACAAACA	ghr-miR827a	21	TTAGATGACCATCAACAAACA	MIR827_2	21	0	0	42
miR528	col-miR528-5p	21	17	TGGAAGGGGCATGCAGAGGAG	osa-miR528-5p	21	TGGAAGGGGCATGCAGAGGAG	MIR528	21	0	0	42
miR161	col-miR161	21	2	TCAATGCATTGAAAGTGACTA	ath-miR161.2	21	TCAATGCATTGAAAGTGACTA	MIR161	21	0	0	42
miR2111	col-miR2111a	21	15	TAATCTGCATCCTGAGGTTTG	ptc-miR2111a	21	TAATCTGCATCCTGAGGTTTG	MIR2111	21	0	0	42
miR394	col-miR394a	20	16	TTGGCATTCTGTCCACCTCC	ath-miR394a	20	TTGGCATTCTGTCCACCTCC	MIR394	20	0	0	40
miR1310	col-miR1310	21	69	AGGCATCGGGGGCGCAACGCC	han-miR1310	22	AGGCATCGGGGGCGCAACGCCC	MIR1310	21	0	1	39
miR7696	col-miR7696a-3p	21	6	TCTGAATCATGAGAACTTGAG	mtr-miR7696a-3p	21	TTGAATTATGAGAACTTGAAG	MIR7696	19	1	2	31
	col-miR7696c-3p	21	1	TTTTGAATTTGAGACCTTGCA	mtr-miR7696c-3p	21	TTTTGAATTATGAGAACTTGA	MIR7696	19	1	2	31
miR6224	col-miR6224a-3p	21	4	CTGATAATATAGGACGGAGGG	sbi-miR6224a-3p	21	CTTATATACTAGGACGGAGGG	MIR6224	19	1	2	31
miR6462	col-miR6462c-5p	21	28	AAGGGACAAAAAGGCTATAAG	ptc-miR6462c-5p	22	AAGGGACAAAAATGGCATAAGA	MIR6462	20	0	3	31
miR4243	col-miR4243	21	3	TTGAACTTGTACGATTTCGAC	ath-miR4243	21	TTGAAATTGTAGATTTCGTAC	MIR4243	19	1	2	31
miR5745	col-miR5745b	21	16	TTTAATTTATATACATCTCAC	mtr-miR5745b	21	TTTAATTTATATACATCGTCA	MIR5745	20	0	2	34
miR902	col-miR902j-5p	24	1	ATATGTTACGCAGATTCTTCATTT	ppt-miR902j-5p	21	ATATGTTGCAGATTCTTCATT	MIR902	21	0	3	33
miR2873	osa-miR2873b	21	10	TTGTGGCTGAGATTTGGTATG	osa-miR2873b	21	TTGGACTTGAGATTTGGTATG	MIR2873	19	1	2	31
undefined	col-miR5162	24	4	AAAATGACCAAAATACCCCTAAAT	osa-miR5162	24	AAATGACCAAAATACCCCTAGAAC	undef	22	1	2	37
undefined	col-miR6248	20	1	TAATTGAGGATGGAGGGAGT	osa-miR6248	21	TATTTGAGGATGGAGGTAGTA	undef	18	2	1	31
undefined	col-miR7767-3p	22	1	TAGGATCAGGCAGCTTGAAGGT	bdi-miR7767-3p	21	AGGAGCAAGCAGCTTGAAGGT	undef	19	2	1	33
undefined	col-miR5997	21	1	TGAAACTCAAGTAGCTAAAAG	ath-miR5997	21	TGAAACCAAGTAGCTAAATAG	undef	20	0	2	34
undefined	col-miR5057	23	1	AAACTTTCAGATGCATTTTGACA	bdi-miR5057	21	AAATTTCAAATCATTTTGACA	undef	20	1	2	33
undefined	col-miR6172	21	1	TGAGACCTGTTTAAGTTAGAA	hbr-miR6172	21	TGGACCGTGTTTAAGTAAGAA	undef	19	1	2	31
undefined	col-miR6279	20	3	TAACAAGAATTCCAGACACA	ppe-miR6279	21	TAGACAAGAATTCCAGAGACC	undef	18	2	1	31
undefined	col-miR6220-3p	23	1	AGACTTATAATTTGGGACGGAGA	sbi-miR6220-3p	24	ATGCCTTATAATTTGGGATGGAGA	undef	21	2	1	37
undefined	col-miR6443	21	1	TGTATGATCATGATGCTGGAG	ptc-miR6443	21	GTATGATCATAGATGATGGAG	undef	19	1	2	31
undefined	col-miR156u	20	17	TGACAGAAGAGAGAGAGCAT	vvi-miR156h	20	TGACAGAAGAGAGAGAGCAT	undef	20	0	0	40
undefined	col-miR3954	22	868222	TTGGACAGAGTAATCACGGTCG	csi-miR3954	21	TGGACAGAGAAATCACGGTCA	undef	19	2	1	33
undefined	col-miR167i	20	1	TCATGCTGGCAGCTTCACTT	gma-miR167i	23	TCATGCTGGCAGCTTCAACTGGT	undef	20	0	3	31
undefined	col-miR6300	19	4400	GTCGTTGTAGTATAGTGGT	gma-miR6300	18	GTCGTTGTAGTATAGTGG	undef	18	0	1	33
undefined	col-miR169p	21	6	TAGCCAAGGACAACTTGCCGG	osa-miR169p	22	TAGCCAAGGACAAACTTGCCGG	undef	21	0	1	39
undefined	col-miR894	20	5406	GTTTCACGTCGGGTTCACCA	ppt-miR894	20	CGTTTCACGTCGGGTTCACC	undef	19	0	2	32
undefined	col-miR472a	22	218	TTTTCCCTACTCCTCCCATCCC	ptc-miR472a	22	TTTTCCCTACTCCACCCATCCC	undef	21	1	0	41
undefined	col-miR5059	21	212	CGGTCCTGGGCAGCAACACCA	bdi-miR5059	20	CGGCCTGGGCAGCACCACCA	undef	19	1	1	34
undefined	col-miR2916	22	312	GGGGGCTCGAAGACGATCAGAT	peu-miR2916	23	TGGGGACTCGAAGACGATCATAT	undef	20	2	1	35
undefined	col-miR5072	21	90	CGTTCCCCAGCGGAGTCGCCA	osa-miR5072	22	CGATTCCCCAGCGGAGTCGCCA	undef	21	0	1	39
undefined	col-miR477h	22	4	ACTCTCCCTCAAGGGCTTCCAG	mes-miR477h	21	ACTCTCCCTCAAGGGCTTCAG	undef	21	0	1	39
undefined	col-miR6478	21	164	CCGACCTTAGCTCAGTTGGTA	ptc-miR6478	21	CCGACCTTAGCTCAGTTGGTG	undef	20	1	0	39
undefined	col-miR5205b	24	306	CTTATAATTAGGGACAGAGGGAGT	mtr-miR5205b	24	CTTATAATTAGGGACGGAGGGAGT	undef	23	1	0	45
undefined	col-miR5205a	24	93	CATATAATATGGGACGGAGGGAGT	mtr-miR5205a	23	CATACAATTTGGGACGGAGGGAG	undef	21	2	1	37
undefined	col-miR7505	21	31	TTCAGAAACCATCCCCTCCTT	ghr-miR7505	21	TTCAGAAACCATCCCTTCCTT	undef	20	1	0	39
undefined	col-miR5077	20	378	GATTCACGTCGGGTTCACCA	osa-miR5077	19	GTTCGCGTCGGGTTCACCA	undef	18	1	1	32
undefined	col-miR5054	20	904	GTTCCCCACAGTCGGCGCCA	bdi-miR5054	18	TCCCCACGGTCGGCGCCA	undef	17	1	2	27
undefined	col-miR845c	24	28	AGGCTCTGATACCAATTGACGTAG	vvi-miR845c	21	AGGCTCTGATACCAATTGATG	undef	21	0	3	33
undefined	col-miR916	22	28	CGAAGGTCGTCGGTTCGAATCC	cre-miR916	21	CCAAGGTCATCGGTTCGATCC	undef	19	2	1	33
undefined	col-miR161-5p.1	21	11	TTGAAAGTGACTACATCGGGG	aly-miR161-5p.1	21	TTGAAAGTGACTACATCGGGG	undef	21	0	0	42
undefined	col-miR1863	24	56	AGCTCTGATACCATGTTAAGCATC	pab-miR1863	22	AGCTCTGATACCATGTTAGATT	undef	21	1	2	35
undefined	col-miR1863a	24	14	AGGCTCTGATACCATGTTAGAAAG	osa-miR1863a	24	AGCTCTGATACCATGTTAGATTAG	undef	22	1	2	37
undefined	col-miR7490	24	41	AGTCTGATAAACTCCACTGACGGT	ghr-miR7490	24	AGTCTAGAAAACTTCACTGACGGT	undef	22	1	2	37
undefined	col-miR3946	21	13	TTGAGAGAAGAGAGAGAGCAC	csi-miR3946	24	TTGTAGAGAAAGAGAAGAGAGCAC	undef	21	0	3	33
undefined	col-miR7728-5p	19	5	TTCGGATTGAGTGGATTTT	bdi-miR7728-5p	21	TGCTCGGATTGAGTGTATTTT	undef	18	1	2	29
undefined	col-miR1862f	21	1	AAGGGGTTGGTTTACTTTTGG	osa-miR1862f	20	ATGAGGTTGGTTTATTTTGG	undef	18	2	1	31
undefined	col-miR6171	21	11	ACTATGGATTGCTGAAGGTTT	hbr-miR6171	21	ATGTGGATTGCTGAAGGCTTT	undef	19	1	2	31
undefined	col-miR5021	21	31	TAAGAAGAATAAGAAGAATAA	ath-miR5021	20	TGAGAAGAAGAAGAAGAAAA	undef	18	2	1	31
undefined	col-miR5244	21	6	TATCTGATGATGATTGTTGGT	mtr-miR5244	21	TATCTCATGAAGATTGTTGGT	undef	19	2	0	36
undefined	col-miR5049-3p	23	30	AAGTAATATGGAACGGAGGGAGT	bdi-miR5049-3p	24	CAAGTAATATGGATCGGAGGAAGT	undef	21	2	1	37
undefined	col-miR5629	23	41	TTAGGGTAGTTAACGGGTAGTTA	ath-miR5629	22	TTAGGGTAGTTAACGGAAGTTA	undef	21	1	1	38

## Sheet: Supplementary file-4
miRNA name	Number of reads	Mature miRNA sequence	Mature miRNA length	MFE(kcal/mol)	Pre-miRNA sequence ( red color indicating the mature miRNA)	Pre-miRNA sequence length	Pre-miRNA structure in dot/bracket format
col-miRN1-5p	1448	GUGGGCGUGCCGGAGUGGUUA	21	-28.9	AUUGGCCAAUGUGGGCGUGCCGGAGUGGUUAUCGGGCAUGACUAGAAAUCAUGUGGGCUCUGCCCGCGCAGGUUCGAA	78	..((((((..((((((((.(((.(.((((((.(..(......)..).)))))).).)))..))))))))..)).))))..
col-miRN2-3p	219	AGAGGGACUAUGGCCGCUUA	20	-53.5	AUUCUAUGGGUGGUGGUGCAUGGCCGUUCUUAGUUGGUGGAGCGAUUUGUCUGGUUAAUUCCGUUAACGAACGAGACCUCAGCCUGCUAACUAGCUAUGUGAAGGUGAGCCUCCGCAGCCAGCUUCUUAGAGGGACUAUGGCCGCUUAGGCCAAGGAA	158	.((((.(((.(((((((.(((((((.(((((((((((..(.((.....((((.(((.....((....))))).))))....)))..)))))))(((.((((.(((....))).))))...))).....)))))).)))))))))))..).))).)))).
col-miRN3-3p	17	UCGGUUUUGAAUUAGAGACGU	21	-85	AAAGAAAAGAGCUUCUCUAUUCAAUCAAGCCAAAUAUCGCCCAAACAUUGGUAUUCGAGCCAUCCGAUCUUUUCAGAACAUCUCGACAGGAUCGAUCUCAAAAUGUGGGAGGUGUGGUAGGAUAGACGUACAUAUCAUAAGAUGCUCCCACGAAUGUAGUCUUCCUGGAUUGACCCAUAAGCAAGGUUUGUUGGAAACAAGAUUCCAUCCAUGCUAAAGGAAUGAUUUUUUUUUAUUUCAUUCAUGUCUUAAAUCUGGAAAUUUAUCCAUCCUCCAUAAAGGAGCCGAAUGAAACCAAAGUUUCAUGUUCGGUUUUGAAUUAGAGACGUUAAAAAUAAA	339	.........(((.(((((((((((...((((.(((((.(...((((.((((((((((.((.....(((.((((((((.........(((((..(((..((...((((((((.(((((((..((....))...))))))).....))))))))..))..))).)))))....(((.....((((.((.....(((((......))))).)).))))....((((((..(......)..))))))..))).....))))))))...)))..((((......)))))))))))...))))).)))))))))).))))))))).)))))).))).........
col-miRN4-3p	14	UGAUGAUUGUGAAGAAGAUGA	21	-66.34	GAUAAAAAUGUCCACUUCUUUACACCCACUAGAUUCUAGCCCUUCCCUUCUCCUUUCUUUCCCUUUUCCUUACCUUCGUCAACAAGAAUUUUCAGAUAAAACAAAAAAUGAAUUAAAGGAAAGGGGGAGAAAAGGAAUGGAAAAAGAGAGGGCCAGAGAAAAAGGAAUGGGGCUAGGUUAGGAUUUGAUGAUUGUGAAGAAGAUGAUAUUGUUUUG	216	......((((((..((((((((((..((.((((((((((((..(((((((((((((..(((((((((((((...(((........)))..((((..............))))...)))))))))))))..)))))..(((............)))........)))).))))...)))))))))))).))..))))))))))..))))))......
col-miRN5-3p	32	AGAGGCUCGGUGAAAUAGACAU	22	-24.62	GUACACAUCUUCUCUUUGUUUCCUUAGCCUCUUGAGUUACAGACAGAGUUUGAGAGAGGCUCGGUGAAAUAGACAUGUCUGUGAAG	86	...((((.......((((((((((.((((((((......(((((...))))).)))))))).)).))))))))......))))...
col-miRN6-5p	11	UUCGUCCCCGGCAACGGCGCCA	22	-66.6	CGCCAUUUGAUUCGUCCCCGGCAACGGCGCCAUUUGAUUCGUGCCCAAUUGGUGUCUCAGCUGAUUUGUGUUCAGCUGGUGCUCCUUGAUUGAGGGAGUAAUCAACAAAAUUUAUUACCUAUAACACCAUACACUAGGGUAGCAAAGAAAAAGCUACUAUAGUAUAGUGGCUCUAGGGUCGUUCACUGGGAAUGAUUAACAAGCA	205	.((...(((((.(((.(((((.((((((.((.((((.....(((((...((((((..(((((((.......))))))).((((((((.....)))))))).......................)))))).......))))).)))).....(((((((((...)))))))))...))))))))..))))).))))))))...)).
col-miRN7-5p	7	UUUUUUAAUUUUUUAUUUAUC	21	-21	UUUUUUUUUUUUUUUUAAUUUUUUAUUUAUCAGAAUAUGGAUGUUUGAUUUUGGUUGCUUUAUAUUUUUAUCUUUAAUUUCUUUGGUGGGUAAUUACAAUUGAAAGAAGAAAAAACA	117	..((((((((((((((((((..(((((((((((((...(((((...(((..(((.....))).)))..))))).....)))..))))))))))....))))))))))))))))))..
col-miRN8-5p	20	GUUGAUCAAGUUGUGGAUGGC	21	-79.32	GAGUAGAUAAGUUGAUCAAGUUGUGGAUGGCACAAAACUAUCUCAACUCUGAUGGAGGUAAAGAGAUGGAGACAGUUGGUAGAGAGUACUUCGACUAUUUAGCAGCUGGGUCUUUCUUCCAAGAUUUUCAAAAGGAUGAUGAUGAUAAUGAUAUAGUAAGUUGUAAGAUGCAUGACAUAGUGCAUGAUUUUGCUCAACUUUUGACUAAGAAUGAAUGCUUUAUUAUGAGCGUUGACAAUGCAGAAGAAGAGAGAACAAGGAUAUCCUUCCAAACAAUUCGUCAUGCCACCUUAACUAGACAACCUUGGGACCCA	314	(.((...(((((((.((.(((((.((.(((((......(((((((.((((..(((((((...((((.(((..((((((.((((.(((......))).)))).))))))..))).)))).....)))))))...))).).))).))))........(..((((((...((((((......))))))..((((.(((..((((((........(.(((((((......))))))).).....))))))..)))))))...(((......)))..))))))..)..))))))).))))).))))).))))..)).).
col-miRN9-3p	2	AAACUUCGAAUUGGGAGGGC	20	-89.3	UUUGAAAUUGCCUUAACUUAGUUGGAGGUUUUGUCAUGAUGGACUGAUGAUUCUGAUACAAAAUGACCUUUGAUUCAAUAUCUAGAGCUUUUGAUUGGGAUAUAUGAUUAGGGUUCGUGUAGGCUGCUUGAAGCAAACUUAGUUUAAAGAAGUUUUGCAGUAGAACUGCGGGUAUUGGGGUGUUUUUGACUAUUAAAAAGUGUGUAAUGGCAAUGUUUCUCAGAUUCAUACUCCAAAAAGAGAACUUCUAUCCAUGUCACUAUGCUCUAUUUGUUGUCAUAGUCAACGAGGUUGAAACUUCAAGGAAAAAACUUCGAAUUGGGAGGGCAAUCCUCCCA	338	...((.((((((((..(((((((.((((((((.((......(((((.(((........((((......))))...(((((..((((((...((((((((.(((((((.......))))))).(((......))).............(((((((((((((.....)))).....(((((((((.(((((((((((.........)))))).........)))))...)))))))))....))))))))).)))).))))....))))))..)))))))))))))...(((((....)))))...)).)))))))).)))))))))))))))..))...
col-miRN10-3p	3	UGAAUGAUUUCGGACCAGGCU	21	-48.3	GAGGGGAAUGUUGUCUGGUUCGAGAUCCUUCGUAUGAAGCUCAAGCAGCGUUUGAAUGAUUUCGGACCAGGCUUCAUUCCCCU	83	.(((((((((..(((((((((((((((.((((.(((..((....))..))).)))).)))))))))))))))..)))))))))	-
col-miRN11-3p	2	GUAAGAAGGGGUAGAGAAAAU	21	-34.9	UACCGAUGAAUAUUCUUGUACUACCCCUUGUUAGUCCUAAAGGAGGCUAGAUUAGUUGAAAGAUGGUUAUUGAUUCAAGGACGCAAGGUGACUUCCUUUUUUAAGGUAAGAAGGGGUAGAGAAAAUAUCUCGAGUC	136	.(((((.((.((((.((...(((((((((.(((..(((((((((((..((.....(((((.(((....)))..)))))...(....)....)).)))))))).)))))).))))))))).)).))))))))).)).	-
col-miRN12-3p	5	AAGAUAGAGAGCACAGAUGAU	21	-51.1	CUAAGGAUCACAUCCAAAGCUCUCUGUCUCUGUUUGGUUCCCUUACAAAACUAACCACCAUACUCCCUCUUCCUCUACCUCUUCCUCCUUCCCUCCCUCUCUCUCUCUCUCUCUCUCUGUUACACACACACACACAAAAUACCCAGGAUAUAUAUUUUGUUUAAUGUUAUGUUGGAGGAGGCACUGGUGACGUUGUUGACAGAAGAUAGAGAGCACAGAUGAUGAAAUGCAA	232	.......(((((((....(((((((((((((((((((((.........)))))..(((((.....((((((((............................................(((.....))).....((((((((...........)))))))).............))))))))...)))))........))))).)))))))))))...)))).))).......
col-miRN13-5p	3	GGCGCUGCCUACUCACUCGGACA	23	-40.77	AAGUAAGGUAGGCGCUGCCUACUCACUCGGACAAUGCUCUGAACACGCAAGUGUGCAGUUCCACCCCCUUCUCCCAUGCUGAGUCACAGGUAGCGCCUCGGAAAGCACGGACGAGCCACAUGCAG	125	.......(.(((((((((((....((((((...(((..(((.((((....)))).)))................))).))))))...)))))))))))).....(((.((.....))...)))..
col-miRN14-3p	7	GUGAGGCUGGUUUCACAGAGCA	22	-39.1	GCGAGAGCAUCAGUGCGGCUGGAGAUUGGCCUGGCUGGGGUUCCUAAAUCUGGAGGGCACCGCGUGAGGCUGGUUUCACAGAGCAGCGUUCACCU	95	((....)).....(((..((((((((..((((.((.(.(((((((........)))).))).))).))))..))))).))).)))..........
col-miRN15-5p	6	GAGUGCAGCCAAGGAUGACUU	21	-64.9	GUGGAGAGUGGAGUGCAGCCAAGGAUGACUUGCCGGAAUUCACAUAUAGAGUGGAAUGAGGCAAUAGACCGGCCUCUUCUCAUGGUGUCCCUGGCAGGUUGUCCUUGGCUACCUUUCGCUCUCUUCU	127	(.(((((((((((.(.(((((((((..(((((((((....(((.......((((((.(((((.........)))))))).))).)))...)))))))))..))))))))).).))))))))))).).
col-miRN16-5p	4	UCAAGGUGGAGAUUGUUAGGA	21	(-93.4)	GGAAUUUGGUUCAAGGUGGAGAUUGUUAGGAAGUGUCCCAAAUUCCUAAUUAGUAUAGAUUCUUUUUUUGUAAGGAAUAUUAUAUAGAAUAUUUCUAAGUUGAUAUAUUAUUGUAAUAUUAGACUUCCUUAUAAAAUAAGGAAGGUUGUUGGAAAUAUCUCUAUAAAUAUUCUAGGUUAUAAGGGGAAAAAUUUAUGAGAUGAAGAUGGGCCUAUAGAGACUAUACGAGAUGUGAGGAAGAAUGGGAAGUACCCGGUGGAGCGAGAGGGCUCGUAGUACGGUAUGGAUACAAGGAGUGGGGAAACAUGGGAUGUUUCGGGAACCUAAUAGUUGUAUCUGGUUCUGUCCU	349	(((....((..(.(((((..((((((((((..((((((((..(((((.(((.((((((.((((....((((((((((((((.((((((((((((((((..((((((.........))))))..(((((((((...)))))))))....)))))))))).))))))))))))))...)))))).(((.....(((((...)))))......)))..)))).))))))..)))...)))))...))))..(((((..(((..(((((....)))))..))))))))..))))..........(((((((...))))))).....)))))))))).))))).)..)).))).
col-miRN17-5p	6	UUAUACGAUGUGGGAUAUUAC	21	-105.3	ACUUUUUCCUUUAUACGAUGUGGGAUAUUACAAUAAAAGGAAAAAAGUUCUUAACACUAUAUAUGUAUAAACUCUUCUUAACCUUGUAAAAGAGUUUUAAAGCUGUGAGAGCCUCUUUCGGCUUAAAGUGAAUAAUAUUUAUAUGGUUGAGGGUGAGUCAUUAGAAAUGGUACUAGAGUCGAUCAUCCACCCCGAUGUGGGGGUUUGUUUUACCUUGUGAGGGGUGUUUAUCUAUUUGACCCCACAAUCCCAUGGGACACAAUGAGAACGUUGUGUCUACAUGAGCGGAGUUGUGAUGUCUCACAUCAAAUAAGAGAAAAAGUA	324	((((((((.(((((..((((((((((((((((((....(((.....(((((....(((((...(.((...(((((((((((((.((((((.....((((((((((.(((.....))).))))))....)))).....)))))).))))))))).))))...)).).)))))...)))).).....)))...(((.(((((((........((((((....))))))....((.....)))))))))....((((((((((((((....)))))))))).))))..))).))))))))))))))))))..))))).)))))))).

## Sheet: Supplementary file-5
Mir Name	Target no.	Target accession	Annotation	Location	Free energy(kcal/mol)	Pathways involved	Pathway ID	Biological Function
miR1439	2	GSVIVT01035251001	DNA-directed RNA polymerase subunit beta	225243	-16.40[77.36%	RNA polymerase,Metabolic pathways,Purine metabolism,Pyrimidine metabolism,	ko03020,ko01100, ko00230,ko00240	metabolic process,cellular component: cell,cell part,organelle,molecular function: binding,catalytic activity
		GSVIVT01003802001	Tubulin folding cofactor	112132	-26.00[76.70%]			cellular process,developmental process,reproduction,reproductive process,single-organism process
miR528	1	GSVIVT01012314001	Conserved gene of unknown function	83105	-26.90[82.77%]
miR530	3	GSVIVT01036920001	glycosyl transferase family 1 protein	101121	-34.90[76.70%]	Glycosylphosphatidylinositol(GPI)-anchor biosynthesis, Glycerolipid , metabolism, Metabolic pathways	ko00563, ko00561, ko01100	molecular function: catalytic activity
		GSVIVT01009471001	Xylem serine proteinase 1	12821302	-28.70[74.35%]			biological regulation, metabolic process, molecular function: binding, catalytic activity
		GSVIVT01018119001	Plus-3 domain containing protein	310330	-37.00[95.85%]
miR5997		GSVIVT01030785001	RNA and export factor binding protein	615633	-31.80[82.60%]	Spliceosome, Herpes simplex infection, RNA transport, mRNA surveillance pathway	ko03040, ko05168 , ko03013, ko03015	cellular_component : cell , cell part, membrane enclosed lumen, organelle, organell part; molecular_function: binding
miR6279	1	GSVIVT01014520001	Serine-threonine/tyrosine-protein kinase domain containing protein	375394	-23.50[74.84%]	Tyrosine metabolism, NF-kappa B signaling pathway, Benzoate degradation, Limonene and pinene degradation,Leishmaniasis, Ethylbenzene degradation, Measles, Aminobenzoate degradation, Metabolic pathways, Chagas disease (American trypanosomiasis), Pyrimidine metabolism,Influenza A, Tuberculosis, Apoptosis,Toll-like receptor signaling pathway, Pertussis, Fructose and mannose metabolism, Microbial met…	ko00350, ko04064, ko00362 , ko00903, ko05140, ko00642, ko05162, ko00627, ko01100, ko05142, ko00240, ko05164, ko05152, ko04210, ko04620, ko05133, ko00051, ko01120, ko04722, ko05145
miR6478	1	GSVIVT01030373001	Ribosomal-protein-alanine acetyltransferase	39,59	-32.80[80.20%]			molecular function: catalytic activity
miR7122	1	GSVIVT01023054001	Ubiquitin ligase E3 alpha	189209	-31.30[82.59%]			biological regulation, cellular process, developmental process, metabolic process, multicellular organismal process, regulation of biological process, response to stimulus, single-organism process ; cellular component: cell, cell part, organelle; molecular function: binding, catalytic activity
miR7505	1	GSVIVT01033992001	Protein binding protein	12681288	-31.90[76.50%]			cellular component organization or biogenesis, establishment of localization, localization, single-organism process; cellular component: cell, cell part, membrane, membrane part, organelle; molecular function: transporter activity
miR916	1	GSVIVT01031724001	Xylem serine proteinase 1	643664	-34.30[79.03%]	Transcriptional misregulation in cancer, p53 signaling pathway, NF-kappa B signaling pathway,Cell cycle, HTLV-I infection, Metabolic pathways, Zeatin biosynthesis, Apoptosis, Biosynthesis of secondary metabolites	ko05202, ko04115, ko04064, ko04110, ko05166, ko01100, ko00908, ko04210, ko01110	molecular_function : catalytic activity
miR6443	2	GSVIVT01007796001	Conserved gene of unknown function	650670	-30.50[81.33%]
		GSVIVT01015227001	Excinuclease ABC, C subunit, N-terminal	310330	-29.60[79.14%]
miR7728	3	GSVIVT01005331001	Conserved gene of unknown function	66,84	-26.40[85.16%]	RNA transport, Leishmaniasis, Legionellosis	ko03013,ko05140,ko05134
		GSVIVT01020927001	Ubiquitin carrier protein	36,54	-26.40[85.16%]	RNA transport, Leishmaniasis, Legionellosis	ko04120
		GSVIVT01031919001	Stem 28 kDa glycoprotein	428446	-24.60[78.85%]	Ubiquitin mediated proteolysis	ko03010	cellular process, developmental process metabolic process, multicellular organismal process response to stimulus, single-organism process Molecular function: catalytic activity
miR7767	1	GSVIVT01016112001	Vacuolar protein sorting-associated protein	511532	-34.10[79.30%]	Ribosome		molecular function: catalytic activity
miR157	8	GSVIVT01008556001	LIGULELESS1 protein	881901	-32.00[87.19%]			cellular component: cell, cell part, organelle molecular function: binding
		GSVIVT01010496001	Squamosa promoter-binding protein	968988	-32.90[88.92%]			molecular function: binding
		GSVIVT01010522001	LIGULELESS1 protein	821841	-32.30[87.30%]			cellular component: cell, cell part, organelle molecular function: binding
		GSVIVT01012247001	Squamosa promoter-binding protein	10551075	-32.30[88.01%]
		GSVIVT01018205001	LIGULELESS1 protein	797817	-32.30[87.30%]			cellular component: cell, cell part, organelle molecular function: binding
		GSVIVT01032239001	Squamosa promoter-binding protein	737757	-32.90[88.92%]
		GSVIVT01033064001	LIGULELESS1 protein	866886	-29.40[79.89%]			cellular component: cell, cell part, organelle molecular function: binding
		GSVIVT01033519001	Squamosa promoter-binding protein	698718	-32.90[88.92%]
miR156	8	GSVIVT01008556001	LIGULELESS1 protein	881901	-32.00[87.19%]			cellular component: cell, cell part, organelle molecular function: binding
		GSVIVT01010496001	Squamosa promoter-binding protein	968988	-32.90[88.92%]			molecular function: binding
		GSVIVT01010522001	LIGULELESS1 protein	821841	-32.30[87.30%]			cellular component: cell, cell part, organelle molecular function: binding
		GSVIVT01012247001	Squamosa promoter-binding protein	10551075	-32.30[88.01%]
		GSVIVT01018205001	LIGULELESS1 protein	797817	-32.30[87.30%]			cellular component: cell, cell part, organelle molecular function: binding
		GSVIVT01032239001	Squamosa promoter-binding protein	737757	-32.90[88.92%]
		GSVIVT01033064001	LIGULELESS1 protein	866886	-29.40[79.89%]			cellular component: cell, cell part, organelle molecular function: binding
		GSVIVT01033519001	DNA binding protein	698718	-32.90[88.92%]
miR166	5	GSVIVT01016272001	DNA binding protein	566586	-37.70[83.41%]			biological adhesion, cellular component organization or biogenesis, cellular process, developmental process growth, metabolic process, multicellular organismal process, reproduction, reproductive process single-organism process cellular component: cell, cell part, organelle molecular function: binding, nucleic acid binding transcription factor activity
		GSVIVT01017010001	PHAVOLUTA-like HD-ZIPIII protein	542562	-38.20[84.51%]			cellular process, metabolic process cellular component: cell, cell part, organelle molecular function: binding, nucleic acid binding transcription factor activity
		GSVIVT01021625001	DNA binding protein	566586	-37.70[83.59%]			cellular process, developmental process metabolic process, multicellular organismal process reproduction,reproductive process single-organism process cellular component: cell, cell part, organelle molecular function: binding, nucleic acid binding transcription factor activity
		GSVIVT01025193001	HB8 HD-ZipIII	563583	-37.70[83.41%]			cellular process, metabolic process, cellular component: cell, cell part, organelle, molecular function: binding, nucleic acid binding transcription factor activity
		GSVIVT01035612001	ARF8	554574	-37.70[83.41%]			cellular process, metabolic process, cellular component: cell, cell part, organelle, molecular function: binding, nucleic acid binding transcription factor activity
miR167	2	GSVIVT01020805001	similar to auxin response factor 8	21712192	-32.30[79.36%]	Plant hormone signal transduction	ko04075	biological regulation, cellular process metabolic process, regulation of biological process response to stimulus, single-organism process molecular function: binding
		GSVIVT01035205001	Peroxidase 29	239260	-32.30[79.36%]	Plant hormone signal transduction	ko04075	biological regulation, cellular process developmental process, metabolic process multicellular organismal process regulation of biological process response to stimulus, signaling single-organism process cellular component: cell, cell part, organelle molecular function: binding
miR396	1	GSVIVT01034984001	Eukaryotic translation initiation factor 2c	163183	-30.60[74.63%]	Phenylalanine metabolism Metabolic pathways Phenylpropanoid biosynthesis Biosynthesis of secondary metabolites	ko00360,ko01100,ko00940, ko01110	metabolic process response to stimulus molecular function: antioxidant activity, binding, catalytic activity.
miR168	1	GSVIVT01029383001	NAC domain-containing protein 21/22	359379	-35.40[79.73%]			cellular process metabolic process molecular function: binding
miR164	4	GSVIVT01007982001	Transcription factor	605625	-40.60[89.82%]			cellular process,metabolic process developmental process cellular component: cell, cell part, organelle molecular function: binding, nucleic acid binding transcription factor activity
		GSVIVT01014287001	growth-regulating factor 1	671691	-40.60[90.42%]
		GSVIVT01019667001	NAC domain protein NAC1	802822	-34.40[76.11%]			cellular process, metabolic process cellular component: cell, cell part, organelle molecular function: binding
		GSVIVT01020478001	ATP binding protein	608628	-39.00[86.09%]			biological regulation, cellular, process, developmental process metabolic process, multicellular organismal process, regulation of biological process, reproduction reproductive process,response to stimulus, signaling, single-organism process molecular function: nucleic acid binding transcription factor activity
miR390	1	GSVIVT01021281001	AP2 domain-containing transcription factor	388408	-35.60[79.11%]	Plant-pathogen interaction	ko04626	biological regulation,cellular process, establishment of localization, localization metabolic process,regulation of biological process,response to stimulus,signaling,single-organism process cellular component: membrane molecular function: catalytic activity, binding
miR172	4	GSVIVT01016352001	Transcription factor APETALA2	863883	-33.00[95.10%]			metabolic process
		GSVIVT01022081001	Protein AINTEGUMENTA	13791399	-33.00[94.83%]			developmental process multi-organism process single-organism process
		GSVIVT01025100001	AP2 domain-containing transcription factor	12681288	-33.70[97.12%]			cellular process, developmental process metabolic process, reproduction reproductive process,response to stimulus
		GSVIVT01025548001	UDP-sugar flavonoid glycosyltransferase	13311351	-33.70[97.12%]
miR160	2	GSVIVT01037411001	UDP-sugar flavonoid glycosyltransferase	16311651	-31.00[75.98%]	Anthocyanin biosynthesis Metabolic pathways Biosynthesis of secondary metabolites	ko00942, ko01100,ko01110
		GSVIVT01037413001	R2r3-myb transcription factor	698718	-31.00[75.98%]	Anthocyanin biosynthesis Metabolic pathways Biosynthesis of secondary metabolites	ko00942, ko01100,ko01110	molecular function: catalytic activity
miR159	4	GSVIVT01012447001	Sporocyteless	957976	-33.00[87.77%]			biological regulation, cellular process, developmental process growth, metabolic process,regulation of biological process reproduction, reproductive process, response to stimulus signaling, single-organism process molecular process: binding
		GSVIVT01014468001	S-receptor kinase	[492,511	-28.50[75.80%]
		GSVIVT01020563001	R2r3-myb transcription factor	31723191	-28.40[75.13%]			cellular process, metabolic process molecular process: binding, catalytic activity.
		GSVIVT01037667001		846865	-29.80[79.05%]			biological regulation,cellular process, developmental process growth, metabolic process, regulation of biological process reproduction, reproductive process, response to stimulus signaling, single-organism process molecular process: binding
miR158	1	GSVIVT01019509001	Nucleotide binding protein	474493	-25.70[76.04%]	RNA transport	ko03013	cellular component organization or biogenesis,cellular process,establishment of localization,localization,metabolic process,response to stimulus,single-organism process,cellular component: cell,cell part,membrane,membrane part,molecular function: binding
miR171	3	GSVIVT01001308001	GRAS family transcription factor	507527	-37.70[98.95%]	Plant hormone signal transduction	ko04075	cellular process,metabolic process
		GSVIVT01019006001	GRAS family transcription factor	681701	-38.20[98.96%]	Plant hormone signal transduction	ko04075
		GSVIVT01027680001	GRAS family transcription factor	702722	-37.60[98.95%]	Plant hormone signal transduction	ko04075	biological regulation,cellular component organization or biogenesis,cellular process,developmental process,metabolic process,multicellular organismal process,negative regulation of biological process,regulation of biological process,rhythmic process,single-organism process,molecular function: binding
miR2111	1	GSVIVT01009890001	E2F4,5	10291049	-31.10[84.05%]	TGF-beta signaling pathway,Cell cycle	ko04350,ko04110	cellular process,metabolic process,cellular component: cell,cell part,organelle
miR2275	3	GSVIVT01021399001	O-acetyltransferase	561582	-24.10[76.03%]			cellular component: cell,cell part,organelle,molecular function: catalytic activity
		GSVIVT01021904001	Double-stranded RNA-binding (DsRBD) domain-containing protein	9871008	-24.00[75.47%]			molecular function: binding
		GSVIVT01023024001	NAC domain protein	14401461	-24.80[79.23%]	pstein-Barr virus infection,Proteasome	ko05169,ko03050
miR2873	7	GSVIVT01014095001	NADH kinase	328345	-23.70[75.72%]			cellular process,metabolic process,cellular component: cell,cell part,molecular function: catalytic activity
		GSVIVT01021569001	Tyrosine/dopa decarboxylase	10531070	-24.00[77.42%]	Isoquinoline alkaloid biosynthesis,Tyrosine metabolism,Metabolic pathways,Biosynthesis of secondary metabolites	ko00950,ko00350,ko01100,ko01110
		GSVIVT01027212001	60S ribosomal protein L13	433450	-24.20[77.32%]	Ribosome	ko03010	metabolic process,cellular component: cell,cell part,macromolecular complex,membrane,membrane-enclosed lumen,organelle,organelle part,molecular function: structural molecule activity
		GSVIVT01031788001	Pentatricopeptide repeat-containing protein	186203	-23.80[76.04%]			developmental process,reproduction,reproductive process,cellular component: cell,cell part,organelle
		GSVIVT01032721001	PpPPR_98 protein	178195	-23.40[75.24%]	Fanconi anemia pathway	ko03460
		GSVIVT01034357001	Serine/threonine-protein phosphatase	343360	-25.10[80.19%]			cellular process,developmental process,metabolic process,multicellular organismal process,reproduction,reproductive process,single-organism process,cellular component: cell,cell part,macromolecular complex,organelle,molecular function: binding,catalytic activity
		GSVIVT01036186001	Pentatricopeptide repeat-containing protein	17151732	-25.80[83.77%]	Fanconi anemia pathway	ko03460
miR393	1	GSVIVT01012904001	GTP-binding protein alpha subunit, gna	18791899	-29.90[77.66%]	MAPK signaling pathway - yeast,Meiosis - yeast	ko04011, ko04113	biological regulation,cellular process,metabolic process,regulation of biological process,response to stimulus,signaling,single-organism process,molecular function: binding,catalytic activity,molecular transducer activity
miR394	3	GSVIVT01010498001	F-box family protein	11161135	-33.60[83.79%]
		GSVIVT01019719001	ATP binding protein	861880	-30.60[76.69%]			metabolic process,molecular function: catalytic activity
		GSVIVT01029150001	ribitol kinase	10511070	-30.80[77.19%]	Plant-pathogen interaction,PPAR signaling pathway,Pentose and glucuronate interconversions,Glycerolipid metabolism,Metabolic pathways	ko04626,ko03320,ko00040,ko00561,ko01100	cellular process,metabolic process,cellular component: cell,cell part,organelle,molecular function: catalytic activity
miR3946	11	GSVIVT01008556001	Squamosa promoter-binding protein	881901	-34.30[87.95%]			cellular component: cell,cell part,organelle,molecular function: binding
		GSVIVT01009602001	Cytochrome P450	508528	-30.20[78.24%]	Flavone and flavonol biosynthesis,Limonene and pinene degradation,Aminobenzoate degradatio,Bisphenol degradation,Polycyclic aromatic hydrocarbon degradation,Metabolic pathways,Flavonoid biosynthesis,Stilbenoid, diarylheptanoid and gingerol biosynthesis,Microbial metabolism in diverse environments,Biosynthesis of secondary metabolites	ko00944,ko00903,ko00627,ko00363,ko00624,ko01100,ko00941,ko00945,ko01120,ko01110
		GSVIVT01010496001	LIGULELESS1 protein	968988	-35.20[89.57%]			molecular function: binding
		GSVIVT01010522001	Squamosa promoter-binding protein	821841	-34.60[88.04%]			cellular component: cell,cell part,organelle,molecular function: binding
		GSVIVT01011007001	Serine endopeptidase degp2	21,41	-33.10[84.22%]			cellular process,metabolic process,cellular component: cell,cell part,organelle,organelle part,molecular function: catalytic activity
		GSVIVT01012247001	LIGULELESS1 protein	10551074	-34.00[89.47%]
		GSVIVT01018205001	Squamosa promoter-binding protein	797816	-34.10[89.50%]			cellular component: cell,cell part,organelle,molecular function: binding
		GSVIVT01032239001	LIGULELESS1 protein	737756	-34.30[89.56%]
		GSVIVT01033064001	Squamosa promoter-binding protein	866885	-31.30[82.80%]			cellular component: cell,cell part,organelle,molecular function: binding
		GSVIVT01033116001	Serine/threonine-protein kinase bri1	16921712	-29.30[75.13%]	Plant-pathogen interaction	ko04626
		GSVIVT01033519001	LIGULELESS1 protein	698718	-35.20[89.57%]
miR395	1	GSVIVT01018057001	ATP-sulfurylase	13,33	-30.50[76.25%]	Selenocompound metabolism,Sulfur metabolism,Metabolic pathways,Purine metabolism,Microbial metabolism in diverse environments	ko00920,ko00450,ko01100,ko00230,ko01120	biological regulation,cellular component organization or biogenesis,cellular process,establishment of localization,localization,metabolic process,response to stimulus,single-organism process ,cellular component: cell,cell part,membrane,organelle,organelle part,molecular function: catalytic activity
miR397	16	GSVIVT01016490001	Laccase	(699,719), (2097,2117)	( -34.30[90.98%] ), ( -34.30[90.98%] )	Ascorbate and aldarate metabolism,Metabolic pathways	ko00053,ko01100	cellular process,metabolic process,cellular component: extracellular region,molecular function: binding ,catalytic activity
		GSVIVT01016490001	Laccase	699-719; 2097-2117	( -30.60[74.63%] ),( -34.30[90.98%] )	Ascorbate and aldarate metabolism,Metabolic pathways	ko00053,ko01100	cellular process,metabolic process,cellular component: extracellular region,molecular function: binding,catalytic activity
		GSVIVT01016512001	Laccase	666686	( -34.30[90.98%] )	Ascorbate and aldarate metabolism,Metabolic pathways	ko00053,ko01100	cellular process,metabolic process,cellular component: extracellular region,molecular function: binding,catalytic activity
		GSVIVT01016512001	Laccase	,666,686,
		GSVIVT01016513001	Laccase	696716	( -34.30[90.98%] )	Ascorbate and aldarate metabolism,Metabolic pathways	ko00053,ko01100	cellular process,metabolic process,cellular component: extracellular region,molecular function: binding,catalytic activity
		GSVIVT01024795001	Laccase	663683	( -29.70[78.78%] )	Ascorbate and aldarate metabolism,Metabolic pathways	ko01100,ko00053	cellular process,metabolic process,cellular component: extracellular region,molecular function: binding,catalytic activity
		GSVIVT01025046001	Laccase	648668	( -33.40[88.13%] )	Ascorbate and aldarate metabolism,Metabolic pathways	ko01100,ko00053	cellular process,metabolic process,cellular component: extracellular region,molecular function: binding,catalytic activity
		GSVIVT01025077001	Laccase	705725	( -30.30[80.59%] )	Ascorbate and aldarate metabolism,Metabolic pathways	ko01100,ko00053	cellular process,metabolic process,cellular component: extracellular region,molecular function: binding,catalytic activity
		GSVIVT01025694001	Laccase	684704	( -31.30[83.02%] )	Ascorbate and aldarate metabolism,Metabolic pathways	ko01100,ko00053	cellular process,metabolic process,cellular component: extracellular region,molecular function: binding,catalytic activity
		GSVIVT01033192001	Laccase	243263	( -35.40[94.15%] )	Ascorbate and aldarate metabolism,Metabolic pathways	ko01100,ko00053	cellular process,metabolic process,cellular component: extracellular region,molecular function: binding,catalytic activity
		GSVIVT01033501001	Laccase	669689	( -34.30[91.22%] )	Ascorbate and aldarate metabolism,Metabolic pathways	ko01100,ko00053	cellular process,metabolic process,cellular component: extracellular region,molecular function: binding,catalytic activity
		GSVIVT01034003001	Laccase 1b	666686	( -30.10[79.84%] )	Ascorbate and aldarate metabolism,Metabolic pathways	ko01100,ko00053	cellular process,metabolic process,cellular component: extracellular region,molecular function: binding,catalytic activity
		GSVIVT01034040001	Laccase 110a	666686	( -35.70[94.20%] )	Ascorbate and aldarate metabolism,Metabolic pathways	ko01100,ko00053	cellular process,metabolic process,cellular component: extracellular region,molecular function: binding,catalytic activity
		GSVIVT01034138001	Laccase	44434463	( -29.70[78.99%] )	Ascorbate and aldarate metabolism,Metabolic pathways	ko01100,ko00053	cellular process,metabolic process,cellular component: extracellular region,molecular function: binding,catalytic activity
		GSVIVT01034139001	Laccase	768788	( -28.90[76.86%] )	Ascorbate and aldarate metabolism,Metabolic pathways	ko01100,ko00053	cellular process,metabolic process,cellular component: extracellular region,molecular function: binding,catalytic activity
		GSVIVT01034146001	Laccase	693713	( -34.10[90.69%] )	Ascorbate and aldarate metabolism,Metabolic pathways	ko01100,ko00053	cellular process,metabolic process,cellular component: extracellular region,molecular function: binding,catalytic activity
miR403	1	GSVIVT01028145001	Conserved gene of unknown function	149169	( -35.60[82.98%] )
miR408	1	GSVIVT01023001001	Basic blue copper protein	38,58	( -38.90[85.49%] )			developmental process,reproduction,reproductive process,cellular component: extracellular region,molecular function: binding
miR472	2	GSVIVT01025709001	Conserved gene of unknown function	81102	( -22.60[77.93%] )
		GSVIVT01038056001	Disease resistance protein	46,67	( -33.40[75.40%] )	Plant-pathogen interaction	ko04626
miR477	2	GSVIVT01010374001	Ubiquitin-protein ligase	,1183,1203,1743,1762	( -34.80[78.56%] ),( -28.80[80.22%] )			cellular process, metabolic process,cellular component: cell,cell part,macromolecular complex, organelle,molecular function: binding, catalytic activity
		GSVIVT01023503001	Pentatricopeptide repeat-containing protein	679699	( -29.00[77.96%] )			cellular component: cell,cell part,organelle
miR5021	3	GSVIVT01001268001	Thylakoid lumenal protein, chloroplastic	491511	( -28.20[76.84%] )	cell		cellular component: cell,cell part,organelle,organelle part
		GSVIVT01017959001	Primary amine oxidase	25,45	( -23.50[90.04%] )	Isoquinoline alkaloid biosynthesis,beta-Alanine metabolism,Tyrosine metabolism,Phenylalanine metabolism,Metabolic pathways,Glycine, serine and threonine metabolism ,Tropane, piperidine and pyridine alkaloid biosynthesis,Biosynthesis of secondary metabolites	ko00950,ko00410,ko00350,ko00360,ko01100,ko00260,ko00960,ko01110,	metabolic process,molecular function: binding, molecular function: catalytic activity
		GSVIVT01031499001	Lactoylglutathione lyase	66,86	( -20.90[80.38%] )	MAPK signaling pathway - yeast,Pyruvate metabolism	ko04011,ko00620	metabolic process ,response to stimulus,component cell,cell part,organelle,molecular function: binding,catalytic activity
miR5054	2	GSVIVT01028606001	Pore-forming toxin Hfr-2	,575,595,1090,1109	( -21.70[82.82%] ),( -28.50[78.73%] )			multi-organism process
		GSVIVT01028617001	Pore-forming toxin Hfr-2	57559510901109	( -36.80[76.83%] ),( -27.30[75.21%] )			biological_process

## Sheet: Supplementary file-6
miRNA-name	Targets Numebr	Target accession	Annotation	Location	free energy(kcal/mol)	Pathways involved	Pathway ID	Biological Function
col-miRN1	1	GSVIVT01015521001	Pentatricopeptide repeat-containing protein, mitochondrial	2244, 2264	-47.30[100.00%]			cellular_component: cell, cell part, organelle
col-miRN4	2	GSVIVT01020089001	Thioredoxin H	16,36	-25.50[77.74%]	Pyrimidine metabolism, Selenocompound metabolism	ko00240, ko00450	developmental process, cellular process, metabolic process, cell_component: Membrane, Molecular function: catalytic activity
		GSVIVT01021522001	Protease degS	67,87	-24.50[74.47%]			cellular process
col-miRN7	6	GSVIVT01000651001	Conserved gene of unknown function	178198	-13.30[76.00%]	Epstein-Barr virus infection, Cytosolic DNA-sensing pathway, RNA polymerase, Huntington's disease Pyrimidine metabolism, Purine metabolism Cell cycle – yeast, Metabolic pathways	ko05169, ko04623, ko03020, ko05016, ko00240, ko00230, ko04111, ko01100
		GSVIVT01000655001	NB-ARC domain containing protein	1291, 1311	-13.30[76.00%]	Epstein-Barr virus infection, Cytosolic DNA-sensing pathway RNA polymerase, Huntington's disease Pyrimidine metabolism, Purine metabolism Plant-pathogen interaction, Metabolic pathways	ko05169, ko04623 ko03020, ko05016 ko00240, ko00230 ko04626, ko01100
		GSVIVT01000657001	NB-ARC domain containing protein	1246, 1266	-13.20[75.86%]	Epstein-Barr virus infection, Cytosolic DNA-sensing pathway RNA polymerase, Huntington's disease Pyrimidine metabolism, Purine metabolism Plant-pathogen interaction, Metabolic pathways	ko05169, ko04623 ko03020, ko05016 ko00240, ko00230 ko04626, ko01100
		GSVIVT01021549001	Conserved gene of unknown function	702722	-12.90[75.00%]
		GSVIVT01035288001	Casein kinase	1464, 1484	-14.20[81.14%]	Hedgehog signaling pathway	ko04340	cellular process metabolic process molecular function: binding, catalytic activity.
		GSVIVT01000656001	NB-ARC domain containing protein	1300, 1320	-13.30[76.00%]	Epstein-Barr virus infection, Cytosolic DNA-sensing pathway, RNA polymerase, Huntington's disease Pyrimidine metabolism, Purine metabolism, Metabolic pathways	ko05169, ko04623 ko03020, ko05016 ko00240, ko00230 ko01100
col-miRN8	2	GSVIVT01033994001	26S proteasome regulatory particle non-ATPase subunit 8	835855	-30.70[78.52%]	Epstein-Barr virus infection, Proteasome	ko05169, ko03050	developmental process, multicellular organismal process, reproduction, reproductive process.
		GSVIVT01037657001	Aconitase	30043024	-29.30[77.11%]	Carbon fixation pathways in prokaryotes,Glyoxylate and dicarboxylate metabolism Citrate cycle (TCA cycle) Biosynthesis of secondary metabolites Microbial metabolism in diverse environments Metabolic pathways Phenylalanine, tyrosine and tryptophan biosynthesis	ko00720, ko00630 ko00020, ko00400 ko01100, ko01120 ko01110

## Sheet: Supplementary file-7
Ontology	Class	Number of genes	Genes
biological_process	biological adhesion	1	GSVIVT01016272001
biological_process	biological regulation	11	GSVIVT01009471001,GSVIVT01023054001, GSVIVT01020805001, GSVIVT01035205001 GSVIVT01020478001, GSVIVT01021281001,GSVIVT01012447001, GSVIVT01037667001 GSVIVT01027680001, GSVIVT01012904001, GSVIVT01018057001
biological_process	cellular component organization or biogenesis	5	GSVIVT01033992001, GSVIVT01016272001, GSVIVT01019509001, GSVIVT01027680001 GSVIVT01018057001
biological_process	cellular process	47	GSVIVT01003802001, GSVIVT01023054001, GSVIVT01031919001, GSVIVT01016272001 GSVIVT01017010001, GSVIVT01021625001, GSVIVT01025193001, GSVIVT01035612001 GSVIVT01020805001, GSVIVT01035205001, GSVIVT01029383001, GSVIVT01007982001 GSVIVT01019667001, GSVIVT01021281001, GSVIVT01025100001, GSVIVT01012447001 GSVIVT01020563001, GSVIVT01037667001, GSVIVT01019509001, GSVIVT01001308001 GSVIVT01027680001, GSVIV…
biological_process	developmental process	18	GSVIVT01003802001, GSVIVT01023054001, GSVIVT01031919001, GSVIVT01016272001 GSVIVT01021625001, GSVIVT01035205001, GSVIVT01007982001, GSVIVT01020478001 GSVIVT01022081001, GSVIVT01025100001, GSVIVT01012447001, GSVIVT01037667001 GSVIVT01027680001, GSVIVT01031788001, GSVIVT01034357001, GSVIVT01023001001 GSVIVT01020089001, GSVIVT01033994001
biological_process	establishment of localization	2	GSVIVT01033992001, GSVIVT01021281001, GSVIVT01019509001, GSVIVT01018057001
biological_process	growth	3	GSVIVT01016272001, GSVIVT01012447001, GSVIVT01037667001
biological_process	localization	4	GSVIVT01033992001, GSVIVT01033992001, GSVIVT01021281001, GSVIVT01021281001 GSVIVT01019509001, GSVIVT01019509001, GSVIVT01018057001, GSVIVT01018057001
biological_process	metabolic process	53	GSVIVT01035251001, GSVIVT01009471001, GSVIVT01023054001, GSVIVT01031919001 GSVIVT01016272001, GSVIVT01017010001, GSVIVT01021625001, GSVIVT01025193001 GSVIVT01035612001, GSVIVT01020805001, GSVIVT01035205001, GSVIVT01034984001 GSVIVT01029383001, GSVIVT01007982001, GSVIVT01019667001, GSVIVT01020478001 GSVIVT01021281001, GSVIVT01016352001, GSVIVT01025100001, GSVIVT01012447001 GSVIVT01020563001, GSVIV…
biological_process	multi-organism process	1	GSVIVT01022081001, GSVIVT01028606001
biological_process	multicellular organismal process	8	GSVIVT01023054001, GSVIVT01031919001 GSVIVT01016272001, GSVIVT01021625001 GSVIVT01035205001 GSVIVT01020478001, GSVIVT01033994001, GSVIVT01033994001
biological_process	negative regulation of biological process	1	GSVIVT01027680001
biological_process	regulation of biological process	8	GSVIVT01023054001, GSVIVT01020805001, GSVIVT01035205001, GSVIVT01020478001 GSVIVT01021281001, GSVIVT01012447001, GSVIVT01037667001, GSVIVT01027680001 GSVIVT01012904001
biological_process	reproduction	11	GSVIVT01003802001, GSVIVT01016272001, GSVIVT01021625001, GSVIVT01020478001 GSVIVT01025100001, GSVIVT01012447001, GSVIVT01037667001, GSVIVT01031788001 GSVIVT01034357001, GSVIVT01023001001, GSVIVT01033994001
biological_process	reproductive process	11	GSVIVT01003802001, GSVIVT01016272001, GSVIVT01021625001, GSVIVT01020478001 GSVIVT01025100001, GSVIVT01012447001, GSVIVT01037667001, GSVIVT01031788001 GSVIVT01034357001, GSVIVT01023001001, GSVIVT01033994001
biological_process	response to stimulus	13	GSVIVT01023054001, GSVIVT01031919001, GSVIVT01020805001, GSVIVT01035205001 GSVIVT01034984001, GSVIVT01020478001, GSVIVT01021281001, GSVIVT01025100001 GSVIVT01012447001, GSVIVT01037667001, GSVIVT01019509001, GSVIVT01012904001 GSVIVT01018057001
biological_process	rhythmic process	1	GSVIVT01027680001
biological_process	signaling	6	GSVIVT01035205001, GSVIVT01020478001, GSVIVT01021281001, GSVIVT01012447001 GSVIVT01037667001, GSVIVT01012904001
biological_process	single-organism process	18	GSVIVT01003802001, GSVIVT01023054001, GSVIVT01033992001, GSVIVT01031919001 GSVIVT01016272001, GSVIVT01021625001, GSVIVT01020805001, GSVIVT01035205001 GSVIVT01020478001, GSVIVT01021281001, GSVIVT01022081001, GSVIVT01012447001 GSVIVT01037667001, GSVIVT01019509001, GSVIVT01027680001, GSVIVT01034357001 GSVIVT01012904001, GSVIVT01018057001
cellular_component	cell	32	GSVIVT01035251001, GSVIVT01035251001, GSVIVT01030785001, GSVIVT01023054001 GSVIVT01033992001, GSVIVT01008556001, GSVIVT01010522001, GSVIVT01018205001 GSVIVT01033064001, GSVIVT01016272001, GSVIVT01017010001, GSVIVT01021625001 GSVIVT01025193001, GSVIVT01035612001, GSVIVT01035205001, GSVIVT01007982001 GSVIVT01019667001, GSVIVT01019509001, GSVIVT01009890001, GSVIVT01021399001 GSVIVT01014095001, GSVIV…
cellular_component	cell part	38	GSVIVT01035251001, GSVIVT01030785001, GSVIVT01023054001, GSVIVT01033992001 GSVIVT01008556001, GSVIVT01010522001, GSVIVT01018205001, GSVIVT01033064001 GSVIVT01008556001, GSVIVT01010522001, GSVIVT01018205001, GSVIVT01033064001 GSVIVT01016272001, GSVIVT01017010001, GSVIVT01021625001, GSVIVT01025193001 GSVIVT01035612001, GSVIVT01035205001, GSVIVT01007982001, GSVIVT01019667001 GSVIVT01019509001, GSVIV…
cellular_component	membrane	6	GSVIVT01030785001, GSVIVT01033992001, GSVIVT01033992001, GSVIVT01021281001, GSVIVT01020089001, GSVIVT01020089001
cellular_component	membrane part	2	GSVIVT01033992001, GSVIVT01019509001
cellular_component	organelle	28	GSVIVT01035251001, GSVIVT01030785001, GSVIVT01023054001, GSVIVT01033992001 GSVIVT01008556001, GSVIVT01010522001, GSVIVT01018205001, GSVIVT01033064001 GSVIVT01016272001, GSVIVT01017010001, GSVIVT01021625001, GSVIVT01025193001 GSVIVT01035612001, GSVIVT01035205001, GSVIVT01007982001, GSVIVT01019667001 GSVIVT01009890001, GSVIVT01021399001, GSVIVT01027212001, GSVIVT01031788001 GSVIVT01034357001, GSVIV…
molecular_function	antioxidant activity	1	GSVIVT01034984001
molecular_function	binding	49	GSVIVT01035251001, GSVIVT01009471001, GSVIVT01030785001, GSVIVT01023054001 GSVIVT01008556001, GSVIVT01010496001, GSVIVT01010522001, GSVIVT01018205001 GSVIVT01033064001, GSVIVT01016272001, GSVIVT01017010001, GSVIVT01021625001 GSVIVT01025193001, GSVIVT01035612001, GSVIVT01020805001, GSVIVT01035205001 GSVIVT01034984001, GSVIVT01029383001, GSVIVT01007982001, GSVIVT01019667001 GSVIVT01020478001, GSVIV…
molecular_function	catalytic activity	39	GSVIVT01035251001, GSVIVT01036920001, GSVIVT01009471001, GSVIVT01030373001 GSVIVT01023054001, GSVIVT01031724001, GSVIVT01031919001, GSVIVT01016112001 GSVIVT01034984001, GSVIVT01021281001, GSVIVT01037413001, GSVIVT01020563001 GSVIVT01021399001, GSVIVT01014095001, GSVIVT01034357001, GSVIVT01012904001 GSVIVT01019719001, GSVIVT01029150001, GSVIVT01011007001, GSVIVT01018057001 GSVIVT01016490001, GSVIV…
molecular_function	nucleic acid binding transcription factor activity	7	GSVIVT01016272001 , GSVIVT01017010001, GSVIVT01021625001,GSVIVT01025193001 GSVIVT01035612001, GSVIVT01007982001, GSVIVT01020478001
molecular_function	transporter activity	1	GSVIVT01033992001

## Sheet: Supplementary file-8
Pathways involved	Number of genes	Pvalue	Qvalue	Pathway ID	Genes	KOs
Aminobenzoate degradation	1	0.654924	0.99652	ko00627	GSVIVT01014520001	K00517+K00924
Apoptosis	2	0.8886	0.99652	ko04210	GSVIVT01014520001, GSVIVT01031724001	K04733+K04728
Benzoate degradation	1	0.532091	0.99652	ko00362	GSVIVT01014520001	K00924+K00074
Biosynthesis of secondary metabolites	4	0.999871	0.999871	ko01110	GSVIVT01031724001, GSVIVT01034984001, GSVIVT01037411001, GSVIVT01037413001	K11821+K12930+K10757+K00514+K01206+K01592+K02291+K00234+K05349+K00128+K05282+K00517+K05280+K00430+K03885+K01183+K00422+K03648+K09840+K00382+K00134+K00276+K03428+K00162+K00083+K00121+K09755+K01476+K01188+K05278+K05277+K00948+K13029+K01662+K14759+K10760
Chagas disease (American trypanosomiasis)	1	0.813104	0.99652	ko05142	GSVIVT01014520001	K04354+K04371+K04733
Ethylbenzene degradation	1	0.586988	0.99652	ko00642	GSVIVT01014520001	K00924
Fructose and mannose metabolism	1	0.922447	0.99652	ko00051	GSVIVT01014520001	K00924
Glycerolipid metabolism	1	0.727861	0.99652	ko00561	GSVIVT01036920001	K00128+K00864+K06119
Herpes simplex infection	1	0.0755693	0.99652	ko05168	GSVIVT01030785001	K03097+K03115+K03131+K12881
HTLV-I infection	1	0.703046	0.99652	ko05166	GSVIVT01031724001
Legionellosis	2	0.63739	0.99652	ko05134	GSVIVT01005331001, GSVIVT01020927001	K03231
Leishmaniasis	2	0.557341	0.99652	ko05140	GSVIVT01005331001, GSVIVT01020927001	K01404+K04371+K04733+K03231
Limonene and pinene degradation	1	0.533002	0.99652	ko00903	GSVIVT01014520001	K00128+K00517+K00924
Measles	1	0.634254	0.99652	ko05162	GSVIVT01014520001
Metabolic pathways	27	0.769197	0.99652	ko01100	GSVIVT01035251001, GSVIVT01036920001, GSVIVT01014520001, GSVIVT01031724001 GSVIVT01034984001, GSVIVT01037411001, GSVIVT01037413001, GSVIVT01021569001 GSVIVT01029150001, GSVIVT01009602001, GSVIVT01018057001, GSVIVT01016490001 GSVIVT01016490001, GSVIVT01016512001, GSVIVT01016513001, GSVIVT01024795001 GSVIVT01025046001, GSVIVT01025077001, GSVIVT01025694001, GSVIVT01033192001 GSVIVT01033501001, GSVIV…	K05857+K03043+K03013+K15227+K01897+K12930+K10757+K00423+K01001+K02636+K00514+K01206+K01592+K00737+K02291+K00234+K02690+K15920+K05349+K00128+K05282+K00875+K00864+K00517+K05280+K13811+K00430+K00924+K03885+K01183+K00422+K03648+K01000+K05283+K09840+K00382+K03661+K00134+K00889+K00276+K10526+K01051+K06119+K03857+K01193+K03428+K00162+K00074+K00083+K01142+K00981+K00121+K09755+K01476+K01115+K01188+K05278+…
Microbial metabolism in diverse environments	3	0.929291	0.99652	ko01120	GSVIVT01014520001,GSVIVT01009602001, GSVIVT01018057001	K01206+K00128+K00517+K13811+K00924+K03885+K00382+K00134+K00162+K00074+K00121+K00948
mRNA surveillance pathway	1	0.288303	0.99652	ko03015	GSVIVT01030785001	K04354+K13126+K14404+K14411+K08873+K12881
Neurotrophin signaling pathway	1	0.935797	0.99652	ko04722	GSVIVT01014520001	K04371+K04733
NF-kappa B signaling pathway	2	0.523446	0.99652	ko04064	GSVIVT01014520001, GSVIVT01031724001	K04733+K03097+K03115+K04728
p53 signaling pathway	1	0.431758	0.99652	ko04115	GSVIVT01031724001	K10151+K04506+K04728
Pertussis	1	0.902901	0.99652	ko05133	GSVIVT01014520001	K04371+K04733
Plant hormone signal transduction	2	0.0120673	0.555927	ko04075	GSVIVT01020805001, GSVIVT01035205001, GSVIVT01001308001, GSVIVT01019006001 GSVIVT01027680001	K14494+K14486+K14484+K14517+K13416+K13415+K14489+K14510+K14431+K14491+K14505+K14515+K14432+K13422
Pyrimidine metabolism	2	0.84172	0.99652	ko00240	GSVIVT01035251001, GSVIVT01014520001	K03043+K03013+K00924+K03671+K03012
Toxoplasmosis.	1	0.941221	0.99652	ko05145	GSVIVT01014520001	K04371+K04733
Tuberculosis	1	0.887416	0.99652	ko05152	GSVIVT01014520001	K04371+K04733+K01379+K03661
Zeatin biosynthesis	1	0.786252	0.99652	ko00908	GSVIVT01031724001	K13496+K10760
Anthocyanin biosynthesis	2	0.0880968	0.99652	ko00942	GSVIVT01037411001, GSVIVT01037413001	K12930
Cell cycle	1	0.688672	0.99652	ko04110	GSVIVT01031724001, GSVIVT01009890001	K03354+K04682+K10151+K03353+K04728
Glycosylphosphatidylinositol(GPI)-anchor biosynthesis	1	0.241434	0.99652	ko00563	GSVIVT01036920001	K05283+K03857
Influenza A	1	0.845622	0.99652	ko05164	GSVIVT01014520001	K04371+K04733+K14404+K14297
Phenylalanine metabolism	2	0.68309	0.99652	ko00360	GSVIVT01034984001, GSVIVT01017959001	K00430+K00276+K00074
Plant-pathogen interaction	4	0.0207569	0.637315	ko04626	GSVIVT01021281001, GSVIVT01029150001, GSVIVT01033116001, GSVIVT01038056001	K13459+K05391+K12795+K13457+K04079+K13428+K13420+K04371+K13416+K13417+K00864+K13430+K13424+K13473+K13422
Purine metabolism	2	0.830162	0.99652	ko00230	GSVIVT01035251001, GSVIVT01018057001	K03043+K03013+K01206+K13811+K00162+K01530+K00948+K03012
Ribosome	2	0.68419	0.99652	ko03010	GSVIVT01016112001, GSVIVT01027212001	K01897+K02873+K05349+K02960+K02955+K02930+K00981+K02962+K00797+K02866
RNA polymerase	1	0.404763	0.99652	ko03020	GSVIVT01035251001	K03043+K03013+K03012
RNA transport	3	0.194345	0.99652	ko03013	GSVIVT01030785001, GSVIVT01005331001, GSVIVT01020927001, GSVIVT01019509001	K13175+K03257+K13126+K14299+K14306+K14311+K14318+K14297+K12881+K03231
Spliceosome	1	0.0480672	0.942398	ko03040	GSVIVT01030785001	K12866+K12811+K12864+K12843+K12825+K12881+K12823
Toll-like receptor signaling pathway	1	0.891595	0.99652	ko04620	GSVIVT01014520001	K04371+K04733
Transcriptional misregulation in cancer	1	0.135473	0.99652	ko05202	GSVIVT01031724001	K10151+K11644+K12823+K04728
Tyrosine metabolism	3	0.369228	0.99652	ko00350	GSVIVT01014520001, GSVIVT01021569001, GSVIVT01017959001	K01592+K00924+K00422+K00276+K00121
Ubiquitin mediated proteolysis	1	0.649951	0.99652	ko04120	GSVIVT01031919001	K03354+K10576+K10583+K03353+K04506+K10579

## Sheet: Supplementary file-9
		BlastN			psRNATarget
Mir Name	MiRNA Sequence	Target no.	Target accession	Annotation	Target no.	Target accession	Expectation (E)	Target Accessibility (UPE)	Annotation
miR1439	TTTTGGAACGGAAGGAGTATT	2	GSVIVT01035251001	DNA-directed RNA polymerase subunit beta	2	GSVIVT01027657001	2	14.763	Beta-tubulin cofactor d
			GSVIVT01003802001	Tubulin folding cofactor		GSVIVT01003802001	2	14.432	Tubulin folding cofactor
miR528	TGGAAGGGGCATGCAGAGGAG	1	GSVIVT01012314001	Conserved gene of unknown function	1	GSVIVT01021576001	2	21.25	Brca1 associated ring domain
miR530	TGCATTTGCACCTGCACCTTT	3	GSVIVT01036920001	glycosyl transferase family 1 protein	1	GSVIVT01004808001	2	23.786	Subtilase
			GSVIVT01009471001	Xylem serine proteinase 1
			GSVIVT01018119001	Plus-3 domain containing protein
miR5997	TGAAACTCAAGTAGCTAAAAG		GSVIVT01030785001	RNA and export factor binding protein	1	GSVIVT01001643001	1	13.029	Conserved gene of unknown function
miR6279	TAACAAGAATTCCAGACACA	1	GSVIVT01014520001	Serine-threonine/tyrosine-protein kinase domain containing protein
miR6478	CCGACCTTAGCTCAGTTGGTA	1	GSVIVT01030373001	Ribosomal-protein-alanine acetyltransferase
miR7122	TTGGACAGAGAAATCACGGTCG	1	GSVIVT01023054001	Ubiquitin ligase E3 alpha
miR7505	TTCAGAAACCATCCCCTCCTT	1	GSVIVT01033992001	Protein binding protein
miR916	CGAAGGTCGTCGGTTCGAATCC	1	GSVIVT01031724001	Xylem serine proteinase 1
miR6443	TGTATGATCATGATGCTGGAG	2	GSVIVT01007796001	Conserved gene of unknown function	1	GSVIVT01007796001	2	14.22	Conserved gene of unknown function
			GSVIVT01015227001	Excinuclease ABC, C subunit, N-terminal
miR7728	TTCGGATTGAGTGGATTTT	3	GSVIVT01005331001	Conserved gene of unknown function
			GSVIVT01020927001	Ubiquitin carrier protein
			GSVIVT01031919001	Stem 28 kDa glycoprotein
miR7767	TAGGATCAGGCAGCTTGAAGGT	1	GSVIVT01016112001	Vacuolar protein sorting-associated protein	1	GSVIVT01023152001	1.5	19.707	Cytosine-specific methyltransferase
miR157	TTGACAGAAGATAGAGAGCAC	8	GSVIVT01008556001	LIGULELESS1 protein	11	GSVIVT01010496001	1	15.171	LIGULELESS1 protein
			GSVIVT01010496001	Squamosa promoter-binding protein		GSVIVT01033519001	1	21.86	LIGULELESS1 protein
			GSVIVT01010522001	LIGULELESS1 protein		GSVIVT01032239001	1	14.685	LIGULELESS1 protein
			GSVIVT01012247001	Squamosa promoter-binding protein		GSVIVT01021087001	1	12.537	Squamosa promoter-binding protein
			GSVIVT01018205001	LIGULELESS1 protein		GSVIVT01012247001	1.5	13.392	LIGULELESS1 protein
			GSVIVT01032239001	Squamosa promoter-binding protein		GSVIVT01010522001	2	15.02	Squamosa promoter-binding protein
			GSVIVT01033064001	LIGULELESS1 protein		GSVIVT01008135001	2	12.193	Conserved gene of unknown function
			GSVIVT01033519001	Squamosa promoter-binding protein		GSVIVT01018205001	2	19.357	Squamosa promoter-binding protein
						GSVIVT01008556001	2	13.422	Squamosa promoter-binding protein
						GSVIVT01020578001	2	17.737	Squamosa promoter binding
						GSVIVT01023152001	1.5	19.707	Cytosine-specific methyltransferase
miR156	TGACAGAAGAGAGTGAGCAC	8	GSVIVT01008556001	LIGULELESS1 protein	11	GSVIVT01010522001	1	15.115	Squamosa promoter-binding protein
			GSVIVT01010496001	Squamosa promoter-binding protein		GSVIVT01010496001	1	14.921	LIGULELESS1 protein
			GSVIVT01010522001	LIGULELESS1 protein		GSVIVT01012247001	1	13.666	LIGULELESS1 protein
			GSVIVT01012247001	Squamosa promoter-binding protein		GSVIVT01008135001	1	15.147	Conserved gene of unknown function
			GSVIVT01018205001	LIGULELESS1 protein		GSVIVT01033519001	1	17.477	LIGULELESS1 protein
			GSVIVT01032239001	Squamosa promoter-binding protein		GSVIVT01018205001	1	19.38	Squamosa promoter-binding protein
			GSVIVT01033064001	LIGULELESS1 protein		GSVIVT01032239001	1	14.933	LIGULELESS1 protein
			GSVIVT01033519001	DNA binding protein		GSVIVT01008556001	1	13.392	Squamosa promoter-binding protein
						GSVIVT01033064001	1.5	11.65	Squamosa promoter-binding protein
						GSVIVT01020578001	2	17.53	Squamosa promoter binding
						GSVIVT01014302001	2	12.88	Squamosa promoter-binding protein
miR166	TCGGACCAGGCTTCATTCCCC	5	GSVIVT01016272001	DNA binding protein	5	GSVIVT01016272001	2	23.995	DNA binding protein
			GSVIVT01017010001	PHAVOLUTA-like HD-ZIPIII protein		GSVIVT01021625001	2	21.088	PHAVOLUTA-like HD-ZIPIII protein
			GSVIVT01021625001	DNA binding protein		GSVIVT01035612001	2	22.742	HB8 HD-ZipIII
			GSVIVT01025193001	HB8 HD-ZipIII		GSVIVT01025193001	2	22.12	DNA binding protein
			GSVIVT01035612001	ARF8		GSVIVT01023152001	1.5	19.707	Cytosine-specific methyltransferase
miR167	TGAAGCTGCCAGCATGATCTA	2	GSVIVT01020805001	similar to auxin response factor 8
			GSVIVT01035205001	Peroxidase 29
miR396	TTCCACAGCTTTCTTGAACTG	1	GSVIVT01034984001	Eukaryotic translation initiation factor 2c	10	GSVIVT01013053001	2	17.794	DNA-binding protein EMBP-1
						GSVIVT01015095001	2	13.881	Growth-regulating factor 1
						GSVIVT01019667001	2	15.233	growth-regulating factor 1
						GSVIVT01016762001	2	13.656	Transcription activator
						GSVIVT01024326001	2	17.26	Growth-regulating factor
						GSVIVT01038629001	2	20.071	UPA17
						GSVIVT01019913001	2	18.136	Growth-regulating factor 10
						GSVIVT01007165001	2	20.663	transcription activator
						GSVIVT01009299001	2	21.986	UPA17
						GSVIVT01027535001	2	22.069	Growth-regulating factor
miR168	TCGCTTGGTGCAGGTCGGGAA	1	GSVIVT01029383001	NAC domain-containing protein 21/22
miR164	TGGAGAAGCAGGGCACGTGCA	4	GSVIVT01007982001	Transcription factor	4	GSVIVT01007982001	1	8.393	NAC domain-containing protein 21/22
			GSVIVT01014287001	growth-regulating factor 1		GSVIVT01014287001	1	24.333	Transcription factor
			GSVIVT01019667001	NAC domain protein NAC1		GSVIVT01020478001	1.5	15.114	NAC domain protein NAC1
			GSVIVT01020478001	ATP binding protein		GSVIVT01019667001	2	15.569	growth-regulating factor 1
miR390	AAGCTCAGGAGGGATAGCGCC	1	GSVIVT01021281001	AP2 domain-containing transcription factor	2	GSVIVT01021281001	2	17.879	ATP binding protein
						GSVIVT01038628001	2	17.723	Leucine Rich Repeat family protein
miR172	AGAATCTTGATGATGCTGCAT	4	GSVIVT01016352001	Transcription factor APETALA2	4	GSVIVT01025548001	0.5	11.489	AP2 domain-containing transcription factor
			GSVIVT01022081001	Protein AINTEGUMENTA		GSVIVT01025100001	0.5	14.04	Protein AINTEGUMENTA
			GSVIVT01025100001	AP2 domain-containing transcription factor		GSVIVT01016352001	1.5	17.172	AP2 domain-containing transcription factor
			GSVIVT01025548001	UDP-sugar flavonoid glycosyltransferase		GSVIVT01022081001	1.5	15.55	Transcription factor APETALA2
miR160	GCGTATGAGGAGCCAAGCATA	2	GSVIVT01037411001	UDP-sugar flavonoid glycosyltransferase
			GSVIVT01037413001	R2r3-myb transcription factor
miR159	TTTGGATTGAAGGGAGCTCTA	4	GSVIVT01012447001	Sporocyteless
			GSVIVT01014468001	S-receptor kinase
			GSVIVT01020563001	R2r3-myb transcription factor
			GSVIVT01037667001
miR158	TCCCAAATGTAGACAAAGCA	1	GSVIVT01019509001	Nucleotide binding protein
miR171	TGATTGAGCCGCGCCAATATC	3	GSVIVT01001308001	GRAS family transcription factor	3	GSVIVT01001308001	0	22.064	GRAS family transcription factor
			GSVIVT01019006001	GRAS family transcription factor		GSVIVT01019006001	0	24.895	GRAS family transcription factor
			GSVIVT01027680001	GRAS family transcription factor		GSVIVT01027680001	0	21.647	GRAS family transcription factor
miR2111	TAATCTGCATCCTGAGGTTTG	1	GSVIVT01009890001	E2F4,5
miR2275	TTAAGTTTTCTCCAATATCTCA	3	GSVIVT01021399001	O-acetyltransferase	3	GSVIVT01019818001	2	11.71	Cytochrome P450
			GSVIVT01021904001	Double-stranded RNA-binding (DsRBD) domain-containing protein		GSVIVT01010280001	2	17.417	BHLH transcription factor
			GSVIVT01023024001	NAC domain protein		GSVIVT01035106001	2	17.237	Sucrose synthase
miR2873	TTGTGGCTGAGATTTGGTATG	7	GSVIVT01014095001	NADH kinase
			GSVIVT01021569001	Tyrosine/dopa decarboxylase
			GSVIVT01027212001	60S ribosomal protein L13
			GSVIVT01031788001	Pentatricopeptide repeat-containing protein
			GSVIVT01032721001	PpPPR_98 protein
			GSVIVT01034357001	Serine/threonine-protein phosphatase
			GSVIVT01036186001	Pentatricopeptide repeat-containing protein
miR393	ATCATGCGATCCCTTCGGAAT	1	GSVIVT01012904001	GTP-binding protein alpha subunit, gna
miR394	TTGGCATTCTGTCCACCTCC	3	GSVIVT01010498001	F-box family protein	8	GSVIVT01010496001	1.5	15.171	LIGULELESS1 protein
			GSVIVT01019719001	ATP binding protein		GSVIVT01033519001	1.5	21.86	LIGULELESS1 protein
			GSVIVT01029150001	ribitol kinase		GSVIVT01032239001	1.5	14.685	LIGULELESS1 protein
						GSVIVT01012247001	2	13.392	LIGULELESS1 protein
						GSVIVT01009602001	2	20.792	Cytochrome P450
						GSVIVT01011007001	2	14.196	Serine endopeptidase degp2
						GSVIVT01001887001	2	13.721	Conserved gene of unknown function
						GSVIVT01035233001	2	8.881	Expansin
miR3946	TTGAGAGAAGAGAGAGAGCAC	11	GSVIVT01008556001	Squamosa promoter-binding protein
			GSVIVT01009602001	Cytochrome P450
			GSVIVT01010496001	LIGULELESS1 protein
			GSVIVT01010522001	Squamosa promoter-binding protein
			GSVIVT01011007001	Serine endopeptidase degp2
			GSVIVT01012247001	LIGULELESS1 protein
			GSVIVT01018205001	Squamosa promoter-binding protein
			GSVIVT01032239001	LIGULELESS1 protein
			GSVIVT01033064001	Squamosa promoter-binding protein
			GSVIVT01033116001	Serine/threonine-protein kinase bri1
			GSVIVT01033519001	LIGULELESS1 protein
miR395	TTGGACAGAGTAATCACGGTCG	1	GSVIVT01018057001	ATP-sulfurylase
miR397	TCATTGAGTGCAGCGTTGATG	16	GSVIVT01016490001	Laccase	14	GSVIVT01016512001	0	12.226	Laccase
			GSVIVT01016490001	Laccase		GSVIVT01034003001	0.5	11.774	Laccase 1b
			GSVIVT01016512001	Laccase		GSVIVT01034139001	0.5	15.432	Laccase
			GSVIVT01016512001	Laccase		GSVIVT01016490001	0.5	13.441	Laccase
			GSVIVT01016513001	Laccase		GSVIVT01016490001	0.5	13.668	Laccase
			GSVIVT01024795001	Laccase		GSVIVT01025694001	1	16.816	Laccase
			GSVIVT01025046001	Laccase		GSVIVT01033192001	1	14.359	Laccase
			GSVIVT01025077001	Laccase		GSVIVT01025077001	1.5	17.256	Laccase
			GSVIVT01025694001	Laccase		GSVIVT01034146001	1.5	9.845	Laccase
			GSVIVT01033192001	Laccase		GSVIVT01016513001	1.5	14.114	Laccase
			GSVIVT01033501001	Laccase		GSVIVT01025046001	1.5	15.786	Laccase
			GSVIVT01034003001	Laccase 1b		GSVIVT01034138001	1.5	18.292	Laccase
			GSVIVT01034040001	Laccase 110a		GSVIVT01024795001	2	13.736	Laccase
			GSVIVT01034138001	Laccase		GSVIVT01034040001	2	10.044	Laccase 110a
			GSVIVT01034139001	Laccase
			GSVIVT01034146001	Laccase
miR403	TTAGATTCACGCACAAACTCG	1	GSVIVT01028145001	Conserved gene of unknown function
miR408	TGCACTGCCTCTTCCCTGGCT	1	GSVIVT01023001001	Basic blue copper protein
miR472	TTTTCCCTACTCCTCCCATCCC	2	GSVIVT01025709001	Conserved gene of unknown function
			GSVIVT01038056001	Disease resistance protein
miR477	ACTCTCCCTCAAGGGCTTCCAG	2	GSVIVT01010374001	Ubiquitin-protein ligase	2	GSVIVT01010305001	1.5	19.226	GRAS family transcription factor
			GSVIVT01023503001	Pentatricopeptide repeat-containing protein		GSVIVT01028775001	2	20.415	WD repeat-containing protein 91 homolog
miR5021	TAAGAAGAATAAGAAGAATAA	3	GSVIVT01001268001	Thylakoid lumenal protein, chloroplastic	15	GSVIVT01027439001	2	12.607	Pyruvate dehydrogenase
			GSVIVT01017959001	Primary amine oxidase		GSVIVT01028042001	2	4.139	Glycosyl hydrolase family 9
			GSVIVT01031499001	Lactoylglutathione lyase		GSVIVT01019377001	2	13.846	Chlorophyll A/B binding protein
						GSVIVT01023795001	2	6.764	Isoflavone reductase 5
						GSVIVT01014104001	2	6.962	similar to Gag-protease-integrase-RT-RNaseH polyprotein
						GSVIVT01017697001	2	12.245	F-box domain containing protein
						GSVIVT01008360001	2	1.402	Pentatricopeptide repeat-containing protein
						GSVIVT01013452001	2	13.303	Squamosa promoter-binding protein
						GSVIVT01020258001	2	8.281	Amino acid transporter
						GSVIVT01020258001	2	11.732	Amino acid transporter
						GSVIVT01010734001	2	13.19	Biotin synthase
						GSVIVT01008034001	2	10.287	Transcription regulator
						GSVIVT01035331001	2	7.703	Zinc finger CCCH domain-containing protein 2
						GSVIVT01035089001	2	19.203	Polygalacturonase
						GSVIVT01031499001	2	1.608	Lactoylglutathione lyase
miR5054	GTTCCCCACAGTCGGCGCCA	2	GSVIVT01028606001	Pore-forming toxin Hfr-2
			GSVIVT01028617001	Pore-forming toxin Hfr-2
